1 **The Diversity and Evolution of Microbial Dissimilatory Phosphite Oxidation**

2 Sophia D. Ewens<sup>1,2</sup>, Alexa F. S. Gomberg<sup>1</sup>, Tyler P. Barnum<sup>1</sup>, Mikayla A. Borton<sup>4</sup>,  
3 Hans K. Carlson<sup>3</sup>, Kelly C. Wrighton<sup>4</sup>, John D. Coates<sup>1,2</sup>

4  
5 <sup>1</sup>Department of Plant and Microbial Biology, University of California, Berkeley, CA, USA

6 <sup>2</sup>Energy & Biosciences Institute, University of California, Berkeley, CA, USA

7 <sup>3</sup>Environmental Genomics and Systems Biology Division, Lawrence Berkeley National Lab,  
8 Berkeley, CA, USA

9 <sup>4</sup>Department of Soil and Crop Sciences, Colorado State University, Fort Collins, CO, USA

10

11 Corresponding Author: John D. Coates

12 Coates Laboratory, Koshland Hall, Room 241, University of California, Berkeley, Berkeley, CA  
13 94720 | (510) 643-8455 | [jdcoates@berkeley.edu](mailto:jdcoates@berkeley.edu)

14

15 **ORCID:**

16 Kelly C. Wrighton: 0000-0003-0434-4217

17 Hans K. Carlson: 0000-0002-1583-5313

18 Alexa F. S. Gomberg: 0000-0002-3596-9191

19

20 **Classification**

21 Major: Biological Sciences

22 Minor: Microbiology

23

24 **Keywords**

25 reduced phosphorous, phosphite, phosphorus, energy metabolism, genome-resolved  
26 metagenomics, ancient metabolism

27

28 **Author Contributions**

29 S.E., T.B., and J.C. conceived and planned metagenomic experimentation and analyses. S.E.  
30 and J.C. conceived and planned wet-lab experiments. S.E., M.B., K.W., and J.C. conceived and  
31 planned taxonomic and metabolic analyses. S.E. and M.B. performed taxonomic and metabolic  
32 analyses. S.E. performed wet-lab experiments and metagenomic analyses. S.E. and A.G.  
33 performed evolutionary analyses. S.E. wrote the manuscript. J.D. supervised the project. S.E.,  
34 A.G., T.B., H.C., J.C. contributed to the interpretation of results. All authors provided critical  
35 feedback and helped shape the research, analyses and manuscript.

36

37

38

39 **Abstract**

40 Phosphite is the most energetically favorable chemotrophic electron donor known, with a half-cell  
41 potential ( $E^{\circ}$ ) of -650 mV for the  $\text{PO}_4^{3-}/\text{PO}_3^{3-}$  couple. Since the discovery of microbial  
42 dissimilatory phosphite oxidation (DPO) in 2000, the environmental distribution, evolution, and  
43 diversity of DPO microorganisms (DPOM) has remained enigmatic and only two species have  
44 been identified. Here metagenomic sequencing of phosphite enriched microbial communities  
45 enabled the reconstruction and metabolic characterization of 21 novel DPOM. These DPOM  
46 spanned six classes of bacteria, including the *Negativicutes*, *Desulfotomaculia*, *Synergistia*,  
47 *Syntrophia*, *Desulfobacteria* and *Desulfomonilia\_A*. Comparing the DPO genes from the genomes  
48 of enriched organisms to over 17,000 publicly available metagenomes revealed the global  
49 existence of this metabolism in diverse anoxic environments, including wastewaters, sediments,  
50 and subsurface aquifers. Despite their newfound environmental and taxonomic diversity,  
51 metagenomic analyses suggested that the typical DPOM is a chemolithoautotroph that occupies  
52 low-oxygen environments and specializes in phosphite oxidation coupled to  $\text{CO}_2$  reduction.  
53 Phylogenetic analyses indicated that the DPO genes form a highly conserved cluster that likely  
54 has ancient origins predating the split of monoderm and diderm bacteria. By coupling microbial  
55 cultivation strategies with metagenomics, these studies highlighted the unsampled metabolic  
56 versatility latent in microbial communities. We have uncovered the unexpected prevalence,  
57 diversity, biochemical specialization, and ancient origins of a unique metabolism central to the  
58 redox cycling of phosphorus, a primary nutrient on earth.

59 **Significance Statement**

60 Geochemical models of the phosphorus (P) cycle uniquely ignore microbial redox  
61 transformations. Yet phosphite is a reduced P source that has been detected in several  
62 environments at concentrations that suggest a contemporary P redox cycle. Microbial  
63 dissimilatory phosphite oxidation (DPO) converts soluble phosphite into phosphate, and a false  
64 notion of rarity has limited our understanding of its diversity and environmental distribution. Here  
65 we demonstrate that DPO is an ancient energy metabolism hosted by taxonomically diverse,  
66 autotrophic bacteria that exist globally throughout anoxic environments. DPO microorganisms are  
67 therefore likely to have provided bioavailable phosphate and fixed carbon to anoxic ecosystems  
68 throughout Earth's history and continue to do so in contemporary environments.

69

70 **Main Text**

71

72 **Introduction**

73 Phosphite ( $\text{PO}_3^{3-}$ ) is a highly soluble, reduced compound that can account for over 30% of the  
74 total dissolved phosphorus in diverse environments<sup>1,2</sup>. Evidence suggests that meteorite impacts  
75 deposited substantial phosphite quantities on early Earth, but its abiotic oxidation to phosphate  
76 after the Great Oxidation Event (~2.5 billion years ago [Gya]) is assumed to have rendered  
77 phosphite negligible in neoteric environments<sup>3</sup>. Surprisingly, phosphite has been detected in  
78 diverse reducing environments, and up to 1  $\mu\text{M}$  was observed in some surface waters,  
79 suggesting contemporary neogenesis<sup>1,3</sup>. Geothermal and hydrothermal systems may generate  
80 phosphite through metal phosphide corrosion and iron-mediated phosphate reduction, and some  
81 phosphite may be derived from biological phosphonate degradation or anomalous phosphate  
82 reduction<sup>1,4,5</sup>. Meanwhile, some phosphite accumulation is likely attributable to anthropogenic  
83 activity because comparatively higher concentrations of phosphite have been identified in  
84 contaminated environments and industrial wastewaters<sup>1,2,6</sup>.

85

86 Despite its enigmatic distribution, functional gene presence in the IMG database<sup>2</sup> predicts that  
87 phosphite is assimilated as a phosphorus source by approximately 1.5% of sequenced  
88 microorganisms<sup>2,7-9</sup>. However, the  $\text{PO}_4^{3-}/\text{PO}_3^{3-}$  redox couple also has an extremely low potential  
89 ( $E^{\circ} = -650$  mV), and microorganisms can alternatively use phosphite as a sole electron donor and  
90 energy source, excreting biogenic phosphate from cells<sup>10</sup>. With the low potential of the  $\text{PO}_4^{3-}$   
91  $/\text{PO}_3^{3-}$  redox couple, phosphite represents the most energetically favorable chemotrophic  
92 microbial electron donor described<sup>11</sup>, yet only two DPOM have been cultured, and only one has  
93 been isolated.

94

95 DPO was first identified in *Desulfotignum phosphitoxidans* strain FiPS-3, an autotrophic  
96 homoacetogenic facultative sulfate-reducing bacterium, isolated from Venetian brackish  
97 sediments<sup>12</sup>. DPO in FiPS-3 is attributed to the *ptx-ptd* gene cluster (*ptxDE-ptdCFGHI*), which  
98 FiPS-3 likely acquired through horizontal gene transfer (HGT)<sup>13-15</sup>. FiPS-3's most closely related  
99 cultured isolate is incapable of DPO although the organisms share 99% 16S rRNA gene  
100 identity<sup>16</sup>. The second known DPOM, Ca. *Phosphitivorax anaerolimi* Phox-21, was enriched from  
101 wastewater collected in Oakland, California, and recently, another *Phosphitivorax* strain (Ca. *P.*  
102 *anaerolimi* F81) was identified in Danish wastewater<sup>17,18</sup>. Phox-21 grows  
103 chemolithoautotrophically with phosphite and carbon dioxide ( $\text{CO}_2$ ) as the sole electron donor  
104 and acceptor, respectively, and is the first naturally occurring species proposed to fix  $\text{CO}_2$  via the  
105 reductive glycine pathway<sup>17,19,20</sup>. The reductive glycine pathway has since been confirmed to  
106 naturally fix  $\text{CO}_2$  in wild-type *Desulfovibrio desulfuricans*<sup>21</sup>. Phox-21 harbors all *ptx-ptd* genes, but  
107 unlike FiPS-3, lacks *ptdG* (a putative transcriptional regulator) and shows no evidence of  
108 horizontal acquisition of the *ptx-ptd* cluster<sup>2,13</sup>. Understanding the evolutionary history of DPO  
109 metabolism is consequently limited by the existence of only two characterized DPOM whose *ptx-*  
110 *ptd* clusters exhibit deviating patterns of composition and inheritance.

111

112 Scarce representation also limits our understanding of the genes, organisms, and environments  
113 that support DPO. It is difficult to predict the range of DPO taxa because *D. phosphitoxidans*  
114 FiPS-3 and Ca. *P. anaerolimi* represent distinct taxonomic classes (*Desulfobacteria* and  
115 *Desulfomonilia\_A*), and their closest relatives are either uncultured or unable to catalyze DPO<sup>2</sup>.  
116 The environmental context of DPO remains ambiguous since DPOM have only been identified in  
117 three distinct locations globally<sup>16-18</sup>. Furthermore, the *ptx-ptd* cluster has unresolved genetic  
118 diversity. *D. phosphitoxidans* FiPS-3 and Ca. *P. anaerolimi* species have *ptx-ptd* clusters with  
119 alternative synteny and gene composition, and the PtxD proteins from FiPS-3 and Phox-21 share  
120 only 55% amino acid sequence similarity<sup>17</sup>. Recognizing the breadth of hosts and environments  
121 supporting this metabolism and characterizing the underlying biochemistry and genetics would  
122 facilitate understanding of how DPOM impact the phosphorus cycle.

123 Here we present the selective enrichment of diverse DPOM in wastewater digester sludge from  
124 facilities around the San Francisco Bay area. Metagenome-assembled genomes (MAGs)  
125 uncovered 21 DPOM spanning three disparate phyla. Comparative genomics revealed  
126 conservation of energy generation and carbon utilization pathways among DPOM genomes,  
127 despite taxonomic diversity. We also identified DPO genes throughout global metagenome  
128 databases and described the diversity of the *ptx-ptd* cluster. The phylogeny of *ptx-ptd* genes  
129 suggests that DPO metabolism is vertically inherited as a conserved unit since before the split of  
130 monoderm (Gram-positive) and diderm (Gram-negative) bacteria. Collectively, our results show  
131 that DPO is widespread across diverse environments and bacterial taxa, and likely represents a  
132 vestige of ancient microbial life.

133

## 134 Results

135

136 **Selective Enrichment.** We hypothesized that DPOM are cultivatable from wastewater sludge  
137 because phosphite can represent up to 2.27% of total dissolved wastewater phosphorus<sup>22</sup> and  
138 because both strains of *Ca. P. anaerolimi* were identified in wastewater digester sludge<sup>17,18</sup>.  
139 Accordingly, sludge from six San Francisco Bay area facilities were used to inoculate 30  
140 enrichment cultures (Supplementary Dataset Table S1). All cultures were grown in bicarbonate-  
141 buffered basal medium amended with 10 mM phosphite and multivariate exogenous electron  
142 acceptors (CO<sub>2</sub>-only, CO<sub>2</sub>+SO<sub>4</sub><sup>2-</sup>, or CO<sub>2</sub>+NO<sub>3</sub><sup>-</sup>) (Supplementary Dataset Table S1). Rumen fluid  
143 (5% by volume) was added to stimulate DPOM growth<sup>17</sup>.

144 Phosphite oxidation was observed in 26 of 30 enrichments and across all six wastewater facilities  
145 (Fig. 1A & B, Supplementary Dataset Table S1). When stationary phase enrichments were re-  
146 spiked with phosphite, DPO activity resumed. No phosphite oxidation occurred in autoclaved  
147 controls (Fig. 1A). Based on prior experience<sup>17</sup>, the high percentage of active DPO enrichments  
148 was unpredicted, indicating a greater prevalence of DPOM than previously assumed.

149 **CO<sub>2</sub> Preference.** DPO was impacted by the amended electron-acceptor. Active enrichments with  
150 only CO<sub>2</sub> supported the highest average phosphite oxidation rate (0.64±0.17 mM PO<sub>3</sub><sup>3-</sup>/day for  
151 CO<sub>2</sub> versus 0.56±0.10 and 0.50±0.20 mM PO<sub>3</sub><sup>3-</sup>/day for NO<sub>3</sub><sup>-</sup> and SO<sub>4</sub><sup>2-</sup>, respectively). CO<sub>2</sub> also  
152 supported DPO from all six sample sites. Despite the availability of nitrate and sulfate, neither  
153 electron acceptor was definitively coupled to phosphite oxidation (Fig. 1C). While all amended  
154 cultures consumed nitrate, it was metabolized before phosphite oxidation was complete,  
155 suggesting utilization independent of DPO. In fact, when compared to other cultures with the  
156 same inoculum, nitrate delayed or even excluded DPO (Fig. 1C). Meanwhile, although sulfate  
157 was consistently consumed at the expected ratio, if reduced to sulfide coupled to phosphite  
158 oxidation (1 mol sulfate per 4 mols phosphite), the timing of sulfate consumption was variable and  
159 frequently offset from DPO (Fig. 1C). This suggests that sulfate reducers may be utilizing a  
160 reduced metabolite from DPO activity. Consistent with this, both of the characterized DPOM  
161 either grow preferentially (FiPS-3) or exclusively (Phox-21) by autotrophy and utilize CO<sub>2</sub> as an  
162 electron acceptor. In the case of FiPS-3, the reduced carbon end-product is acetate<sup>16</sup>, which is  
163 readily utilized by sulfate reducers. Our results support a DPOM preference for CO<sub>2</sub> and indicate  
164 that alternative electron acceptors may inhibit DPO activity<sup>2</sup>.

165 **DPOM Identification.** To characterize the active DPOM, we recovered metagenome-assembled  
166 genomes (MAGs) from CO<sub>2</sub>-only enrichments. To identify candidate DPOM, we searched all  
167 MAGs using custom-built profile-HMMs (Files S1 – S7) for each of the seven *ptx-ptd* genes<sup>13,15</sup>. In  
168 total, 21 genomes had at least one gene from the *ptx-ptd* cluster (DPO MAGs), and of these, 19  
169 were of high quality (>90% complete; <5% redundant) (Supplementary Dataset Table S3)<sup>24</sup>. DPO  
170 MAGs were enriched in all phosphite amended communities (compared to no-phosphite controls)  
171 (Fig. 2A) and were dominant in all but one community (SL1) (Fig. 2B). Furthermore, every  
172 sequenced community had at least one DPO MAG (Fig. 2B). These results confirmed that DPO

173 activity in phosphite amended enrichments was dependent on the *ptx-ptd* genes and further  
174 indicates that these genes serve as effective probes for DPOM.

175 **DPOM Taxonomy.** DPOM taxonomy assignments were made using (i) reconstructed 16S rRNA  
176 gene fragments<sup>25</sup>, (ii) multigene alignments using the genome taxonomy database (GTDB)<sup>26</sup>, and  
177 (iii) alignment of the ribosomal S8 proteins (rpS8)<sup>27</sup>. Assignments were congruent in each  
178 instance and visualized in Figure 3. Prior to our study, DPOM had been identified as belonging to  
179 only two taxonomic classes of the *Desulfobacterota* phylum. In contrast, DPOM in our  
180 enrichments span the monoderm-diderm taxonomic boundaries and include three phyla  
181 (*Desulfobacterota*, *Firmicutes*, and *Synergistota*) and six classes (*Negativicutes*,  
182 *Desulfotomaculia*, *Synergistia*, *Syntrophia*, *Desulfobacteria* and *Desulfomonilia\_A*) (Fig. 3).

183 *Desulfomonilia\_A* was the most sampled class of DPOM (Fig. 3), comprising 13 of 21 DPO  
184 MAGs. They were enriched from all six sample sites and were present in nine communities.  
185 Furthermore, they were the most relatively abundant DPO MAG (representing >85%) in each of  
186 eight communities, indicating a possible advantage under our enrichment conditions (Figs. 2B, 3).  
187 *Desulfomonilia\_A* is an uncultured class that has recently been distinguished from the  
188 *Desulfomonilia* (<https://gtdb.ecogenomic.org/>). Consistent with this, the *Desulfomonilia* are  
189 represented by *Desulfomonile tiedjei*, which shares just 49% rpS8 sequence identity to the most  
190 closely related DPO MAG of *Desulfomonilia\_A*<sup>28,29</sup> (Fig. 3). All DPO MAGs of the  
191 *Desulfomonilia\_A* class belong to the uncultured order UBA1062 (previously denoted GW-28)<sup>17</sup>,  
192 which includes *Ca. Phosphitivorax* (Supplementary Dataset Table S3). The monophyletic  
193 separation of the *Desulfomonilia\_A* DPOM supports the hypothesis that *Ca. Phosphitivorax*  
194 species are part of a unique order, and possibly a unique class, for which DPO is a common  
195 metabolic feature<sup>17</sup>.

196 Beyond the *Desulfomonilia\_A* DPOM, we recovered eight additional genomic representatives  
197 from four novel classes (*Negativicutes*, *Desulfotomaculia*, *Synergistia*, and *Syntrophia*) (Fig. 3).  
198 While most of these are minority DPOM in their respective communities, at least three  
199 (*Pelotomaculaceae* SL1, *Ca. Smithella* SM1, and *Ca. Smithella* LM1) dominate their DPOM  
200 populations (>83%) (Figs. 2B, 3). The *Ca. Negativicutes* and *Ca. Desulfotomaculia* MAGs  
201 represent the first DPO genomes taxonomically assigned to the *Firmicutes* phylum, highlighting  
202 the broad evolutionary divergence of DPOM<sup>30,31</sup>.

203 The closest cultured relatives of DPO MAGs share 57-95% rpS8 amino acid sequence identity  
204 (Fig. 3), which surpasses the species threshold (<98.3%)<sup>27</sup>. Furthermore, multigene classification  
205 by GTDB designates these related isolates as belonging to at least different genera<sup>27</sup>, making  
206 predictions about DPOM physiology from taxonomy unreliable. Regardless, all characterized  
207 DPO MAG relatives, regardless of taxonomy, are obligately anaerobic chemoorganotrophs.  
208 Furthermore, the *Desulfomonilia\_A*, *Desulfotomaculia*, and *Syntrophia* classes contain canonical  
209 representatives that are dependent on syntrophic associations<sup>18,31-34</sup>. The phylogenetic  
210 relatedness of our DPOM to notoriously fastidious syntrophic organisms could explain the  
211 difficulty in isolating DPOM<sup>17</sup>.

212 The 16S rRNA gene is the canonical taxonomic marker for resolving microbial speciation. While  
213 not present in all DPO MAGs, 86% (n=18) contained the 16S rRNA gene, enabling refined  
214 taxonomic analyses (Supplementary Dataset Table S4). To capture the novelty of enriched  
215 DPOM, we used EMIRGE to reconstruct full-length 16S rRNA gene sequences that were BLAST  
216 searched in the SILVA database<sup>25,35</sup>. We determined that the DPOM represented 14 new strains,  
217 six new species, and one new genus based on standardized relatedness metrics<sup>27</sup>. Proposed  
218 names and etymologies are provided in Supplementary Dataset Table S4. The novel genus,  
219 represented by *Cosmobacter schinkii* SL3 (named in recognition of Bernhard Schink, for his  
220 exemplary contributions to microbiology and discovery of the first DPOM<sup>12,16</sup>), is the second  
221 characterized genus of the *Desulfomonilia\_A* UBA1062 order, in addition to *Ca. Phosphitivorax*.  
222 Consequently, UBA1062 was expanded to include two genera and five species (Fig. 3).



223 **Metabolic Traits.** The genomes of FiPS-3 and Phox-21 have been used to predict the  
224 mechanism for DPO energy conservation<sup>13,17</sup>. In the model (Fig. 4), the Ptx-Ptd protein cluster is  
225 hypothesized to oxidize phosphite and generate NADH and ATP through substrate level  
226 phosphorylation. Alternative reducing equivalents are likely produced via a Na<sup>+</sup> motive force,  
227 ferredoxin, and an electron confurcation mechanism. The model proposes CO<sub>2</sub> to be fixed into  
228 biomass via the reductive glycine pathway, as was suggested for Phox-21<sup>17</sup>. In contrast, FiPS-3  
229 utilizes the Wood-Ljungdahl pathway<sup>13</sup>. By comparing the genomes of DPO MAGs to FiPS-3 and  
230 Phox-21, we found highly conserved metabolic traits beyond the *ptx-ptd* gene cluster, regardless  
231 of taxonomy.

232 **Energy Conservation.** Like Phox-21, all DPO MAGs were missing a classical electron transport  
233 chain (ETC), as complexes II-IV were either absent or incomplete (Fig. 5). *Sporomusaceae* SM1  
234 of the *Negativicutes* class had a complete NADH-quinone oxidoreductase (complex I), including  
235 the N, Q, and P-modules for NADH dehydrogenase activity, quinone reduction, and proton  
236 translocation, respectively. However, all other DPO MAGs only contained N-module subunits  
237 (Fig. 5, Supplementary Dataset Table S5). The N-module houses the FMN and FeS clusters for  
238 electron transport, as well as the NADH binding site. It also chimerically associates with other  
239 protein complexes, such as formate dehydrogenases, catalyzing reversible NADH-dependent  
240 formate production<sup>36,37</sup>. Poehlein *et al.* suggested that the FiPS-3 N-module may directly transfer  
241 electrons from NADH to ferredoxin<sup>13</sup>. However, direct NADH-dependent ferredoxin reduction is  
242 thermodynamically unfavorable<sup>38</sup>. Furthermore, the N-module of DPO MAGs is located in various  
243 genomic contexts, making it unclear whether the commonality is uniquely associated with DPO  
244 activity or with alternative cellular functions.

245 In Phox-21, ferredoxin reduction by NADH is attributed to a sodium translocating  
246 ferredoxin:NADH oxidoreductase (Rnf) driven by a Na<sup>+</sup> motive force<sup>17</sup> (Fig. 4). Consistent with  
247 Phox-21, an Rnf complex was present in the *Synergistia* and nearly all *Desulfomonilia\_A* DPO  
248 MAGs (Fig. 5). In contrast, the Rnf was absent from the *Negativicutes*, *Desulfotomaculia*, and  
249 *Syntrophia* DPO MAGs, suggesting that it is dispensable or replaceable for DPO activity. The ion  
250 motive force for Rnf activity in Phox-21 is likely provided by a cation-translocating F-type ATPase  
251 at the expense of ATP (Fig. 4). The F-type ATPase was present in every DPO MAG, except one  
252 (*Synergistaceae* SL3) which had the V-type (Fig. 5). While two genomes (*Syntrophales* LM1 and  
253 *Pelotomaculaceae* LM1) were missing several ATPase subunits, these were only 61% and 69%  
254 complete (Supplementary Dataset Table S3)<sup>24</sup>. Given the universal absence of an ETC in DPO  
255 MAGs, the ATPases are likely involved in ATP hydrolysis with the concomitant generation of a  
256 cation motive force.

257 **CO<sub>2</sub> as an Electron Acceptor.** No DPO MAGs harbored functional pathways for  
258 methanogenesis or common respiratory pathways (oxygen, nitrate, or sulfate), which is similar to  
259 Phox-21 and consistent with the absence of ETC complexes (SI Appendix Fig. S2). Furthermore,  
260 CO<sub>2</sub> was the only exogenous electron acceptor available to DPOM in sequenced cultures.  
261 Consistent with Phox-21<sup>17</sup>, a physiological survey of one of our enrichments showed that CO<sub>2</sub>  
262 was necessary and sufficient to support phosphite oxidation and growth (Fig. 6). As observed in  
263 Phox-21, comparative genomics of DPO MAGs revealed a notable absence of any canonical  
264 CO<sub>2</sub>-reduction pathways (Fig. 5). While FiPS-3 can use CO<sub>2</sub> as an electron acceptor by reducing  
265 it to acetate via the Wood-Ljungdahl pathway<sup>16</sup>, carbon reduction in Phox-21 was attributed to the  
266 reductive glycine pathway<sup>17</sup>. This is comprised of the methyl branch of the Wood-Ljungdahl  
267 pathway, combined with the glycine cleavage system, serine hydroxymethyltransferase, and  
268 serine deaminase to produce pyruvate as an anabolic intermediate<sup>17,21</sup> (Fig. 4). The Phox-21 final  
269 product of CO<sub>2</sub> reduction remains enigmatic, as the genes for pyruvate conversion to acetate  
270 (phosphotransacetylase and acetate kinase) are missing from the genome. Lactate is a  
271 possibility, as the genomes of Phox-21 and all other *Desulfomonilia\_A* DPO MAGs contain D-  
272 lactate dehydrogenase, which converts pyruvate to lactate at the expense of NADH (Fig. 4). This

273 is an energetically favorable reaction that accounts for all reducing equivalents produced via  
274 phosphite oxidation according to figure 4 and:

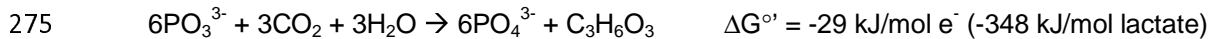

276 **CO<sub>2</sub> Fixation to Biomass.** In addition to serving as the electron acceptor for DPOM, CO<sub>2</sub> is also  
277 fixed into biomass as the carbon source<sup>17</sup> (Fig. 6). While none of the DPO MAGs contained any  
278 canonical CO<sub>2</sub> fixation pathways<sup>39</sup>, twelve in the *Desulfomonilia\_A*, *Negativicutes*, and *Syntrophia*  
279 classes had all the genes necessary for CO<sub>2</sub>-fixation to pyruvate via the reductive glycine  
280 pathway<sup>21</sup> (Figs. 4 & 5). Of the residual nine DPO MAGs whose reductive glycine pathway was  
281 incomplete, four were missing homologs of serine deaminases, preventing the final conversion of  
282 serine to pyruvate (Supplementary Dataset Table S6). The remaining five DPO MAGs (ranging  
283 from 61.3 – 98.7% completion) were missing between one and four genes involved in formate  
284 and/or glycine transformations, severely impeding the overall pathway (Supplementary Dataset  
285 Tables S5, S6). It is possible that homologous enzymes may perform the reactions of missing  
286 genes, as might be the case for one genome (*Syntrophales* LM1) which harbored a serine-  
287 glyoxylate transaminase as opposed to the standard serine deaminase (Supplementary Dataset  
288 Table S6). Even if not a universal carbon fixation pathway in DPOM, our analyses suggest the  
289 reductive glycine pathway might be an important autotrophic mechanism across diverse DPO  
290 taxa. Carbon-tracing studies will be necessary to understand how individual DPOM use CO<sub>2</sub> to  
291 simultaneously generate biomass and capture energy from phosphite oxidation.

292 ***ptx-ptd* Cluster Diversity.** DPO activity in FiPS-3 and Phox-21 was attributed to the *ptx-ptd* gene  
293 cluster, and only organisms with *ptx-ptd* genes were enriched, positing this to be the dominant, or  
294 possibly sole, metabolic pathway underlying phosphite oxidation<sup>13,14,17</sup> (Fig. 2A). To determine the  
295 prevalence and diversity of DPOM beyond our enrichments, we used the PtxD protein sequence  
296 from FiPS-3 as a marker gene to query the IMG/M protein sequence space (Supplementary  
297 Dataset Table S7). We recovered 15 positive hits that were phylogenetically compared to the  
298 PtxD from our enriched DPO MAGs and the two previously known DPO species (Fig. 7).

299 Our analysis revealed that the DPO-PtxD form a monophyletic clade that included all validated  
300 DPOM (i.e. FiPS-3, Phox-21, and our enriched DPOM). The DPO-PtxD belonged to the  
301 glyoxylate/hydroxypyruvate reductase B (GHRB) protein sub-family of the D-2-hydroxyacid  
302 dehydrogenases (2HADH). The closest relatives of DPO-PtxD are the sugar dehydrogenases  
303 and the PtxD homologs involved in phosphorus assimilation<sup>40</sup> (Fig. 7A, Supplementary Dataset  
304 Table S8). The DPO PtxD can be distinguished from closely related proteins based on the  
305 presence of nearby *ptd* genes (Fig. 7). The closest non-DPO homolog (Ga0209611\_10199181) of  
306 the DPO-PtxD lacks the remaining *ptx-ptd* genes in the inclusion-matrix (Fig. 7C), demonstrating  
307 the specificity of our custom pHMMs (File S1 – S7).

308 The DPO PtxD was found exclusively in anoxic environments (Fig. 7B). The predicted failure of  
309 DPOM to occupy oxic environments, despite the thermodynamic favorability of DPO coupled to  
310 oxygen respiration ( $\Delta G^{\circ'} = -283 \text{ kJ.mol}^{-1} \text{ PO}_3^{3-}$ ), suggests that metabolic proteins may be oxygen  
311 sensitive. Alternatively, DPO metabolism may be dependent on the biochemical pathways of  
312 anaerobes. While DPOM appear to be common members of diverse anoxic environments, further  
313 analyses will be required to describe their relative abundance in natural habitats.

314 **Evolutionary History.** The DPO evolutionary history was ascertained using (i) genomic features  
315 (ii) comparative taxonomic clustering, and (iii) syntenic conservation. Within the DPO-PtxD clade,  
316 proteins clustered based on host taxonomy, and the PtxD was distinguishable at the genus level  
317 (Fig. 7B). The only deviation from this pattern was *Ca. Smithella phosphorovis* LM1 of the  
318 *Syntrophia* class, which had a PtxD lineage consistent with *Ca. Phosphitivorax* species of the  
319 *Desulfomonilia\_A* class (Fig. 7B). The *ptx-ptd* cluster from *Ca. S. phosphorovis* LM1 occurred on  
320 a single contig (13,378 bp) that hosted an IS91 family transposase. This contig had a sequencing  
321 depth (64.7x) three-fold that of the bin's average coverage (19.4x), and the GC content (57.4%)

322 was 3.5% higher than the host genome mean GC content (53.9%). Together these findings  
323 suggest that, like FiPS-3<sup>16</sup>, *Ca. S. phosphorovis* LM1 likely acquired its *ptx-ptd* genes through  
324 horizontal gene transfer (HGT). Consistent with this conclusion, the LM1 community assembly did  
325 not include taxonomic marker genes for *Ca. Phosphitivorax* species, and the assembly graph  
326 supported the binning results, precluding a different bin-assignment for this contig.

327 In contrast to FiPS-3 and *Ca. S. phosphorovis* LM1, most PtxD clustered according to host  
328 taxonomy, indicating that most DPOM likely acquired their PtxD via vertical inheritance (Fig. 7B).  
329 Similar taxonomic clustering occurred for the PtdC and PtdF, further suggesting that the *ptx-ptd*  
330 genes are inherited as a metabolic unit (SI Appendix Fig. S3). Tanglegram analyses facilitate a  
331 coarse approximation of topological similarity between gene phylogenies, where crossing lines  
332 (“tangles”) indicate alternative evolutionary histories<sup>41</sup>. Comparisons of the PtxD, PtdC, and PtdF  
333 exhibited zero tangling, supporting a linked evolutionary history (SI Appendix Fig. S4). Although  
334 the phylogenetic trees of individual DPO genes showed alternative branching patterns, this was  
335 expected, as genes with functional differences are subject to unique selective pressures.

336 Synteny provides an alternative metric to gauge the unison of *ptx-ptd* gene evolution because: (i)  
337 linked genes tend to maintain organization throughout evolutionary history, and (ii) closely related  
338 taxa show high genomic stability<sup>42,43</sup>. We found that the individual *ptx* and *ptd* genes were always  
339 codirectional in the order *ptxED* and *ptdCF(G)HI*, respectively (SI Appendix Fig. S5). However,  
340 the directionality between the *ptx* and *ptd* gene clusters was variable and syntenic variation  
341 formed four distinct groups (Groups I-IV, SI Appendix Fig. S5) that correlated with host taxonomy.  
342 Groups I and IV do not contain *ptdG*, suggesting it is nonessential (SI Appendix Fig. S5). While  
343 other genes were frequently missing from the *ptx-ptd* cluster, synteny analysis suggested this is  
344 due to fragmented contigs (Fig. 6C, SI Appendix Fig. S5). For example, *Synergistaceae* SL3 was  
345 identified as a DPOM in our enrichments, but our pHMM search failed to identify its PtxD (Fig. 7).  
346 Synteny suggested that the PtxD was truncated downstream of PtxE, which was confirmed by  
347 BLAST alignment (SI Appendix Fig. S5).

348 Searching metagenome databases with additional DPO genes would likely reveal other DPO  
349 contigs that were split from the PtxD. This was the case when we mined the IMG/M database for  
350 PtdC and identified five additional contigs with divergent PtxD phylogeny (Fig. 6A, SI Appendix  
351 Fig. S4). While these divergent genes may indicate further DPO diversity, their contigs showed  
352 non-canonical *ptx-ptd* neighborhoods and are not yet represented by validated DPO cultures. For  
353 those *ptx-ptd* clusters that confidently represent DPOM, the predominance of vertical transfer was  
354 collectively supported by genomic features, taxonomy, and synteny.

## 355 Discussion

356  
357 We used cultivation-based investigations coupled to high-resolution metagenomics to clarify  
358 many of the confounding factors that have precluded understanding of DPOM. Results from our  
359 studies have expanded the known diversity of DPOM ten-fold (from 2 to 21 genomes). Notably,  
360 phosphorus redox cycling coupled to CO<sub>2</sub> reduction appears to be the primary metabolic niche  
361 occupied by DPOM. Although DPOM coupled to any known inorganic electron acceptor (oxygen,  
362 manganese, perchlorate, nitrate, iron, sulfate etc.) is thermodynamically favorable, DPOM  
363 genomes encode sparse electron transport machinery and are largely devoid of the enzymes  
364 required to reduce these ions. CO<sub>2</sub> was the only exogenous electron acceptor provided to our  
365 sequenced enrichments, and physiological experiments demonstrated a CO<sub>2</sub>-dependency. Yet  
366 DPOM also lacked canonical carbon reduction or fixation pathways. The reductive glycine  
367 pathway was present in many DPOM and may support CO<sub>2</sub> fixation, but the method by which  
368 CO<sub>2</sub> is fixed by the remaining DPOM is unknown, as is the end product of CO<sub>2</sub> reduction (e.g.  
369 ethanol or lactate), begging future metabolomic analyses.

370 The highly specialized metabolic repertoire of DPOM is analogous to that of syntrophs,  
371 corroborating the observation that DPOM frequently belong to known syntrophic taxa<sup>44</sup>.



372 Thermodynamically, phosphite is too energetically favorable an electron donor to require a  
373 syntrophic partner, but such a co-dependency would explain their resistance to isolation<sup>17</sup>. *D.*  
374 *phosphitoxidans* FiPS-3 remains the only cultured isolate to date, yet we failed to cultivate any  
375 close relatives of FiPS-3 in our enrichments, despite otherwise representing much of the DPO  
376 diversity present in global metagenomes. Furthermore, we found that FiPS-3 is phenotypically  
377 and genotypically anomalous when compared to other DPOM. FiPS-3 exhibits greater metabolic  
378 versatility than typical DPOM, reducing sulfate, thiosulfate, and nitrate as electron acceptors in  
379 addition to CO<sub>2</sub><sup>13,16,17</sup>. FiPS-3 is also one of only two examples by which the *ptx-ptd* genes were  
380 likely acquired via HGT, suggesting that DPO is not its primary energy metabolism. Future efforts  
381 to cultivate DPOM may consequently be informed by our DPO MAGs, whose metabolic features  
382 suggest a dependence on limited substrates and a potential requirement for microbial  
383 partnerships.

384 Our DPOM spanned six classes of three bacterial phyla (*Desulfobacterota*, *Firmicutes* and  
385 *Synergistota*). Such sparse representation across diverse taxa is typically indicative of broad-  
386 host-range HGT, but phylogenetic analyses of the *ptx-ptd* gene cluster showed that DPO  
387 metabolic gene evolution mirrored the host taxonomy. This indicates that vertical transfer is the  
388 predominant mechanism of inheritance. Small variations in synteny further support the correlation  
389 between gene order and taxonomy while also suggesting that *ptx-ptd* genes have coevolved as a  
390 metabolic unit specialized for DPO metabolism.

391 Given the diversity of DPOM lineages that likely inherited the *ptx-ptd* gene cluster vertically, it is  
392 tempting to speculate the biological timescale for when DPO metabolism originated. The last  
393 common node for all known DPOM suggests that DPOM arose before the divergence of  
394 monoderm and diderm bacteria<sup>45</sup>. Mapping the divergence of these clades to geological  
395 timescales suggests that DPOM ~3.2 Gya<sup>46</sup>, contemporaneously with anoxygenic  
396 photosynthesis and ~0.8 Gya after the evolution of methanogenesis<sup>46</sup>. This is consistent with the  
397 suggestion that phosphite composed 40-67% of dissolved phosphorus species in Archaean  
398 oceans (>3.5 Gya)<sup>47,48</sup>. The half-life of oceanic phosphite under a reducing atmosphere is  
399 expected to be 0.1-10 billion years, which would have allowed phosphite persistence on early  
400 Earth, possibly supporting a robust chemolithoautotrophic DPO population.

401 One would expect such an ancient metabolism to be detected more broadly across all bacteria.  
402 However, oxygenation of Earth's atmosphere since the great oxidation event (~2.5 Gya) has  
403 likely depleted ancient natural phosphite reserves, as oxidizing radicals abiotically oxidize  
404 phosphite on geological timescales<sup>3,49</sup>. Phosphite would consequently be too rare for DPO in  
405 most contemporary environments, and lack of positive selection would promote widespread gene  
406 loss<sup>50</sup>. Yet pockets of phosphite (0.1 – 1.3 μM) exist in diverse contemporary environments, and  
407 phosphite oxidizing metabolisms still occur in various habitats on extant Earth<sup>10,22,51,52</sup>.  
408 Environmental metadata from global metagenomes identified DPOM in multiple anoxic  
409 environments that represent relics of ancient Earth (i.e. oil reservoirs, deep subsurface aquifers)  
410 and serve as potential examples of contemporary phosphite accumulation (i.e. wastewater  
411 sludge, freshwater wetlands). A number of environments evidently continue to support  
412 phosphorus redox cycling. By coupling DPO to primary production via an uncharacterized CO<sub>2</sub>  
413 reduction pathway, DPOM likely play a unique ecological role in any environment they inhabit.

## 414 **Methods**

415

### 416 **Growth Conditions and Sampling.**

417 Enrichment inocula were obtained from six wastewater treatment facilities in the San Francisco  
418 Bay area of California (Supplementary Dataset Table S1). Serum bottles (150ml volume) (Bellco,  
419 Vineland, NJ, USA) containing basal media (45mL) were each inoculated with sludge (5mL) and  
420 incubated at 37 °C. Anoxic medium was prepared by boiling under N<sub>2</sub>/CO<sub>2</sub> (80:20, v/v) to remove  
421 dissolved O<sub>2</sub>, and dispensed under N<sub>2</sub>/CO<sub>2</sub> (80:20, v/v) into anaerobic pressure tubes or serum

422 bottles. These were capped with thick butyl rubber stoppers and sterilized by autoclaving (15 min  
423 at 121 °C). The basal medium was composed of (per 1 L of DI water): 5 g NaHCO<sub>3</sub>, 12 g HEPES  
424 buffer, 1 g NH<sub>4</sub>Cl, 0.5 g KCl, 1.5 g MgCl<sub>2</sub>, 0.15 g CaCl<sub>2</sub> (2H<sub>2</sub>O), 0.5 g L-cysteine HCl and 10 mL  
425 each of vitamins and trace minerals<sup>53</sup>. Saline medium additionally contained 20 g/L NaCl. Salt  
426 solutions of Na<sub>2</sub>HPO<sub>3</sub>, Na<sub>2</sub>SO<sub>4</sub>, and NaNO<sub>3</sub> (10mM) were added from sterile anoxic stocks as  
427 needed. Rumen fluid (Bar Diamond Inc, Parma, ID, USA), prepared by degassing (30 minutes  
428 with N<sub>2</sub>) and autoclaving (121 °C for 30 min), was added to the basal media as required. Heat  
429 killed controls were autoclaved at 121 °C for 1 h. Samples for DNA extraction were pelleted by 30  
430 min centrifugation at 10,000 rcf and stored at -80 °C. Samples for ion determination were filtered  
431 and stored at 4 °C prior to ion chromatography (IC) using the method described previously<sup>17</sup>. Cell  
432 growth was measured as optical density at 600nm (OD<sub>600</sub>) using a Genesys™ 20 Visible  
433 Spectrophotometer (Thermo Scientific).

434

### 435 **Metagenomic Assembly, Binning, and Annotation.**

436 Sequenced communities were grown in triplicate cultures amended with 5% rumen fluid with or  
437 without 10 mM phosphite (SI Appendix Fig. S1). DNA was extracted from the no-phosphite  
438 triplicates in stationary phase (-Ps), and the 10 mM phosphite triplicates in exponential phase  
439 (+Pe) and stationary phase (+Ps) (SI Appendix Fig. S1). Community R1 failed to reach stationary  
440 phase and was only represented by samples -Ps and +Pe. Communities LM1, R3, SL1, and SL3  
441 failed to reproduce activity and were instead sampled from two previously active enrichments (E1  
442 and E2) (SI Appendix Fig. S1). DNA was extracted using the DNeasy PowerLyzer Microbial Kit  
443 (Qiagen) and sequenced with an Illumina HiSeq 4000 (150 bp paired-end reads) at the UC  
444 Berkeley Vincent J. Coates Genomics Sequencing Laboratory. Reads were trimmed and filtered  
445 using Sickle v1.33 (quality threshold value of 20)<sup>54</sup>. Gene-level taxonomy was assigned using  
446 Centrifuge v1.0.1-beta-27-g30e3f06ec3<sup>55</sup>. Reads for each of the 11 communities were combined  
447 and co-assembled using MEGAHIT v1.1.2<sup>56</sup> using the meta-sensitive preset. Reads were  
448 mapped to assembled contigs using BWA-MEM v0.7.17<sup>57</sup> with default parameters. Contigs over  
449 1000 bp from each combined assembly were binned into individual genomes using Anvi'o v5.4.0  
450<sup>58</sup>. Communities with < 30,000 contigs (LM3, M1, R1, SM1, SM3, SV1, SV3) were binned  
451 manually using patterns of hierarchical clustering, sequencing coverage, GC content, and gene-  
452 level taxonomic assignments. Communities with > 30,000 contigs (LM1, R3, SL1, SL3) were  
453 binned automatically using CONCOCT then manually refined with the Anvi'o graphical interface<sup>59</sup>.  
454 Quality of metagenome-assembled genomes (MAGs) was measured from lineage-specific,  
455 conserved, single-copy marker genes using the CheckM v1.0.18 lineage workflow<sup>60</sup>. The resulting  
456 11 co-assemblies consisted of 1900 Mbp, 1.99 million contigs, and 574 draft genomes  
457 (Supplementary Dataset Table S2). Only draft genomes of medium quality or greater (>50%  
458 completion; <10% redundant)<sup>24</sup> were subjected to further study, resulting in 239 metagenome-  
459 assembled genomes (MAGs) that represent 60% (647 Mbp) of the binned contigs  
460 (Supplementary Dataset Table S3). Open reading frames were predicted from selected genomes  
461 using Prodigal v2.6.3<sup>61</sup> and assigned taxonomy using the Genome Taxonomy Database toolkit  
462 (GTDB-Tk)<sup>26</sup>, which placed MAGs into protein reference trees using concatenated SCG sets.  
463 Contigs of interest were functionally annotated with Prokka v1.14.6<sup>62</sup>.

464 The DPO MAGs were also annotated with DRAM<sup>63</sup>, a genome annotation tool that provides  
465 metabolic profiles for each input genome. For contigs of interest, these annotations were  
466 compared to Prokka v1.14.6 annotations<sup>62</sup>. More detailed DRAM analyses are provided in Shaffer  
467 & Borton *et al.*<sup>63</sup>. The raw annotations containing an inventory of all database annotations for  
468 every gene from each input genome are reported in Supplementary Table S6. From the raw  
469 annotations, DRAM then summarizes key metabolisms across the genomes, with SI Appendix  
470 Figure S2 showing the DRAM Product output. All code for DRAM is available on github:  
471 <https://github.com/shafferm/DRAM>.

### 472 **Identification of Metagenomic DPO Proteins.**

473 DPO proteins (PtxD, PtdC, PtdF) were identified from publicly available metagenomes. The  
474 largest metagenomes (representing 90% of proteins from each ecosystem category) in the JGI  
475 Integrated Microbial Genomes and Metagenomes (IMG/M) database were collected (n=17,888)  
476 on August 1, 2018 (Supplementary Dataset Table S7). Sequence data from the IMG/M database  
477 were produced by the US Department of Energy Joint Genome Institute (<http://www.jgi.doe.gov/>)  
478 in collaboration with the user community. The FiPS-3 PtxD, PtdC, and PtdF were searched  
479 against all proteins using BLASTP with bit score thresholds of 270, 300, and 250 respectively.  
480 Positive hits were aligned using MUSCLE v3.8.1551<sup>64</sup> and constructed into an approximately  
481 maximum-likelihood phylogenetic tree using FastTree v2.1.11<sup>65</sup> with 1000 bootstrap resamplings.  
482 DPO proteins were defined as (i) those that formed a phylogenetically distinct clade with proteins  
483 from experimentally validated DPOM (ii) were found on a contig near at least one other putative  
484 DPO gene and (iii) were at least 90% the length of their homolog protein in FiPS-3. Protein  
485 sequences from the identified *ptx-ptd* gene clusters were used to create profile Hidden Markov  
486 Models (pHMMs) for each of the PtxDE-PtdCFGHI proteins using HMMER v3.2.1<sup>66,67</sup>. These  
487 pHMMs are available as supplementary files (File S1-S7). Bit score thresholds for stringent *de*  
488 *novo* identification of DPO proteins were determined by a reciprocal pHMM search on a subset of  
489 the IMG/M database (Supplementary Dataset Table S9). To compare the evolutionary  
490 relationships between the PtxD, PtdC, and PtdF, members of the DPO clade were dereplicated  
491 with CD-HIT v4.8.1<sup>68</sup> by clustering proteins with 100% sequence similarity and selecting the  
492 largest contig to represent each gene cluster in a simplified phylogenetic tree. Tanglegrams  
493 comparing PtxD to PtdC and PtdF were generated with Dendroscope v3.7.2<sup>69</sup>. Gene synteny  
494 was visualized with SimpleSynteny<sup>70</sup>, where genes were identified with BLAST and annotated  
495 according to our custom pHMMs.

#### 496 **Characterization of DPO Genomes.**

497 Annotated proteins from all MAGs were searched for known DPO genes (*ptxDE-ptdCFGHI*) with  
498 our custom pHMMs. MAGs were operationally considered capable of DPO if they included at  
499 least one gene from the *ptx-ptd* gene cluster. The *ptx-ptd* genes that were absent from MAGs  
500 were searched for in all remaining contigs of the respective community.

501 A pHMM for the *rpS8* was obtained from Wu *et al.* and applied to all DPO MAGs<sup>67,71</sup>. The *rpS8*  
502 gene has been shown to effectively represent whole-genome average nucleotide identity (ANI)  
503 values<sup>27</sup> and was present once in each DPO MAG. Each *rpS8* was BLAST searched against the  
504 NCBI GenBank database to identify the closest relative, closest isolated relative, and informative  
505 representatives for phylogenetic analysis. Identified close relatives corresponded to the multi-  
506 gene taxonomy assignments of the GTDB (Supplementary Dataset Table S4). Sequences were  
507 aligned using MUSCLE v3.8.1551<sup>64</sup>, and an approximately-maximum-likelihood phylogenetic tree  
508 was constructed with 1000 bootstrap resamplings using FastTree v2.1.11<sup>69</sup>. Trees were  
509 visualized using FigTree v1.4.4 (<http://tree.bio.ed.ac.uk/software/figtree/>).

510 The 16S rRNA gene for each community was reconstructed from metagenomic reads using  
511 default parameters in EMIRGE with 50 iterations<sup>25</sup>. Reconstructed genes were classified using  
512 SILVA<sup>35</sup> and mapped back to the 16S rRNA gene fragments of DPO MAGs. The novelty of each  
513 DPO MAG was determined by the rank of closest relatives in the GTDB, NCBI (*rpS8*), and SILVA  
514 (16S rRNA gene) databases (Supplementary Dataset Table S4). A DPO MAG was considered  
515 novel at the specified rank (i.e. species, genus) based on the following thresholds: (i) GTDB,  
516 considered novel if there were no logged relatives for that rank; (ii) NCBI (*rpS8*), considered  
517 a novel species if the closest relative was <98.3% identity; (iii) SILVA (16S rRNA gene) considered  
518 a novel species if the closest relative shared <96.7% identity and a novel genus if the closest  
519 relative shared <94% identity<sup>27</sup>. The novelty of a DPO MAG was assigned based on the lowest  
520 resolved taxonomic rank between all searched databases.

#### 521 **Data Deposition**

522 All metagenomic reads, assemblies, and curated metagenome-assembled genomes (MAGs;  
523 quality metrics >50% complete and <10% redundant) are available through the NCBI BioProject  
524 accession #####.

## 525 **Acknowledgments**

526  
527 We thank A. Englebrekston, I. Figueroa, M. Silverberg, Y. Liu, C. Thrash, J. Taylor, and S.  
528 McDevitt for laboratory support and guidance on evolutionary analysis and sequencing.  
529 Wastewater sludge samples were generously provided by Judy Walker (San Leandro Water  
530 Treatment), Alope Vaid (Veolia Water North America, Richmond), Bob Wandro & Robert  
531 Huffstutler (Silicon Valley Clean Water), Jan Guy & Pete Dallabetta (San Mateo Waste Water  
532 Treatment Plant), Nimisha Patel (Sewerage Agency of Southern Marin), and Jimmie Truesdell  
533 (City of Livermore Water Resources Department). Funding for phosphorus redox cycling is  
534 provided by the Energy & Biosciences Institute (Berkeley, CA) and the US Department of Energy  
535 Genomic Science Program to J.D.C. Independent funding to S.D.E through the EBI-Shell  
536 Fellowship was supported by Shell International Exploration and Production Inc.

537

538 **Competing Interests.** The authors declare no competing interests.

539

540 **References.**

- 541 1. Pasek, M. A., Sampson, J. M. & Atlas, Z. Redox chemistry in the phosphorus  
542 biogeochemical cycle. *Proc. Natl. Acad. Sci.* **111**, 15468–15473 (2014).
- 543 2. Figueroa, I. A. & Coates, J. D. Microbial Phosphite Oxidation and Its Potential Role in the  
544 Global Phosphorus and Carbon Cycles. *Adv. Appl. Microbiol.* **98**, 93–117 (2017).
- 545 3. Pasek, M. A. Rethinking early Earth phosphorus geochemistry. **105**, 853–858 (2008).
- 546 4. Herschy, B. *et al.* Archaeal phosphorus liberation induced by iron redox geochemistry.  
547 *Nat. Commun.* 1–7 (2018) doi:10.1038/s41467-018-03835-3.
- 548 5. Britvin, S. N., Murashko, M. N., Vapnik, Y., Polekhovskiy, Y. S. & Krivovichev, S. V. Earth's  
549 phosphides in Levant and insights into the source of Archean prebiotic phosphorus. *Sci.*  
550 *Rep.* **5**, 10–14 (2015).
- 551 6. Han, C. *et al.* Phosphite in sedimentary interstitial water of Lake Taihu, a large eutrophic  
552 shallow lake in China. *Environ. Sci. Technol.* **47**, 5679–5685 (2013).
- 553 7. White, A. K. & Metcalf, W. W. The htx and ptx Operons of *Pseudomonas stutzeri* WM88  
554 Are New Members of the Pho Regulon. *J. Bacteriol.* **186**, 5876–5882 (2004).
- 555 8. Costas, A. M. G., White, A. K. & Metcalf, W. W. Purification and Characterization of a  
556 Novel Phosphorus-oxidizing Enzyme from *Pseudomonas stutzeri* WM88. *J. Biol. Chem.*  
557 **276**, 17429–17436 (2001).
- 558 9. Wilson, M. M. & Metcalf, W. W. Genetic Diversity and Horizontal Transfer of Genes  
559 Involved in Oxidation of Reduced Phosphorus Compounds by *Alcaligenes faecalis*  
560 WM2072. *Appl. Environ. Microbiol.* **71**, 290–296 (2005).
- 561 10. White, A. K. & Metcalf, W. W. Microbial Metabolism of Reduced Phosphorus Compounds.  
562 *Annu. Rev. Microbiol.* **61**, 379–400 (2007).
- 563 11. Roels, J. & Verstraete, W. Biological formation of volatile phosphorus compounds.  
564 *Bioresour. Technol.* **79**, 243–250 (2001).
- 565 12. Schink, B. & Friedrich, M. Bacterial metabolism: Phosphite oxidation by sulphate  
566 reduction. *Nature* **406**, 37 (2000).
- 567 13. Poehlein, A., Daniel, R., Schink, B. & Simeonova, D. D. Life based on phosphite: a  
568 genome-guided analysis of *Desulfotignum phosphitoxidans*. *BMC Genomics* **14**, 753  
569 (2013).
- 570 14. Simeonova, D. D., Susnea, I., Moise, A., Schink, B. & Przybylski, M. “Unknown Genome”  
571 Proteomics. *Mol. Cell. Proteomics* 122–131 (2009) doi:10.1074/mcp.M800242-MCP200.
- 572 15. Simeonova, D. D., Wilson, M. M., Metcalf, W. W. & Schink, B. Identification and  
573 heterologous expression of genes involved in anaerobic dissimilatory phosphite oxidation  
574 by *Desulfotignum phosphitoxidans*. *J. Bacteriol.* **192**, 5237–5244 (2010).
- 575 16. Schink, B., Thiemann, V., Laue, H. & Friedrich, M. W. *Desulfotignum phosphitoxidans* sp .  
576 nov ., a new marine sulfate reducer that oxidizes phosphite to phosphate. *Arch. Microbiol.*  
577 **177**, 381–391 (2002).
- 578 17. Figueroa, I. A. *et al.* Metagenomics-guided analysis of microbial chemolithoautotrophic  
579 phosphite oxidation yields evidence of a seventh natural CO<sub>2</sub> fixation pathway. *Proc. Natl.*  
580 *Acad. Sci.* 201715549 (2017) doi:10.1073/pnas.1715549114.
- 581 18. Hao, L. *et al.* Novel syntrophic bacteria in full-scale anaerobic digesters revealed by  
582 genome-centric metatranscriptomics. *ISME J.* (2020) doi:10.1038/s41396-019-0571-0.
- 583 19. Yishai, O., Bouzon, M., Döring, V. & Bar-Even, A. In vivo assimilation of one-carbon via a  
584 synthetic reductive glycine pathway in *Escherichia coli*. *ACS Synth. Biol.* (2018)



- 585           doi:10.1021/acssynbio.8b00131.
- 586   20.   Bar-Even, A. Formate Assimilation: The Metabolic Architecture of Natural and Synthetic  
587        Pathways. *Biochemistry* (2016) doi:10.1021/acs.biochem.6b00495.
- 588   21.   Sánchez-Andrea, I. *et al.* The reductive glycine pathway allows autotrophic growth of  
589        *Desulfovibrio desulfuricans*. *Nat. Commun.* 1–12 (2020) doi:10.1038/s41467-020-18906-7.
- 590   22.   Yu, X., Geng, J., Ren, H., Chao, H. & Qiu, H. Determination of phosphite in a full-scale  
591        municipal wastewater treatment plant. *Environ. Sci. Process. Impacts* **17**, 441–447 (2015).
- 592   23.   Liang, S. *et al.* One-Step Treatment of Phosphite-Laden Wastewater: A Single  
593        Electrochemical Reactor Integrating Superoxide Radical-Induced Oxidation and  
594        Electrocoagulation. *Environ. Sci. Technol.* **53**, 5328–5336 (2019).
- 595   24.   Bowers, R. M. *et al.* Minimum information about a single amplified genome (MISAG) and a  
596        metagenome-assembled genome (MIMAG) of bacteria and archaea. *Nat. Biotechnol.* **35**,  
597        725–731 (2017).
- 598   25.   Miller, C. S., Baker, B. J., Thomas, B. C., Singer, S. W. & Banfield, J. F. EMIRGE:  
599        Reconstruction of full-length ribosomal genes from microbial community short read  
600        sequencing data. *Genome Biol.* **12**, (2011).
- 601   26.   Chaumeil, P.-A., Mussig, A. J., Hugenholtz, P. & Parks, D. H. GTDB-Tk: a toolkit to  
602        classify genomes with the Genome Taxonomy Database. *Bioinformatics* 1–3 (2019)  
603        doi:10.1093/bioinformatics/btz848.
- 604   27.   Olm, M. R. *et al.* Consistent Metagenome-Derived Metrics Verify and Delineate Bacterial  
605        Species Boundaries. *mSystems* **5**, e00731-19 (2020).
- 606   28.   Galushko, A. & Kuever, J. Desulfomonile. in *Bergey's Manual of Systematics of Archaea  
607        and Bacteria* (2019).
- 608   29.   Kim, A. D., Mandelco, L., Tanner, R. S., Woese, C. R. & Suflita, J. M. Desulfomonile  
609        *tiedjei* gen. nov. and sp. nov., a novel anaerobic, dehalogenating, sulfate-reducing  
610        bacterium. *Arch. Microbiol.* **154**, 23–30 (1990).
- 611   30.   Rainey, F. A. Pelotomaculum. in *Bergey's Manual of Systematics of Archaea and Bacteria*  
612        1–6 (2009).
- 613   31.   Imachi, H. *et al.* Pelotomaculum thermopropionicum gen. nov., sp. nov., an anaerobic,  
614        thermophilic, syntrophic propionate-oxidizing bacterium. *Int. J. Syst. Evol. Microbiol.* **52**,  
615        1729–1735 (2002).
- 616   32.   Liu, Y., Balkwill, D. L., Henry, C. A., Drake, G. R. & Boone, D. R. Characterization of the  
617        anaerobic propionate-degrading syntrophs *Smithella propionica*. *Int. J. Syst. Bacteriol.* **49**,  
618        545–556 (1999).
- 619   33.   McInerney, M. J. *et al.* Physiology, ecology, phylogeny, and genomics of microorganisms  
620        capable of syntrophic metabolism. *Ann. N. Y. Acad. Sci.* **1125**, 58–72 (2008).
- 621   34.   Mouttaki, H., Nanny, M. A. & McInerney, M. J. Cyclohexane carboxylate and benzoate  
622        formation from crotonate in *Syntrophus aciditrophicus*. *Appl. Environ. Microbiol.* **73**, 930–  
623        938 (2007).
- 624   35.   Pruesse, E. *et al.* SILVA: A comprehensive online resource for quality checked and  
625        aligned ribosomal RNA sequence data compatible with ARB. *Nucleic Acids Res.* **35**,  
626        7188–7196 (2007).
- 627   36.   Friedrich, T., Dekovic, D. K. & Burschel, S. Assembly of the *Escherichia coli*  
628        NADH:ubiquinone oxidoreductase (respiratory complex I). *Biochim. Biophys. Acta -  
629        Bioenerg.* **1857**, 214–223 (2016).

- 630 37. Young, T. *et al.* Crystallographic and kinetic analyses of the FdsBG subcomplex of the  
631 cytosolic formate dehydrogenase FdsABG from *Cupriavidus necator*. *J. Biol. Chem.* **295**,  
632 6570–6585 (2020).
- 633 38. Jouanneau, Y., Jeong, H. S., Hugo, N., Meyer, C. & Willison, J. C. Overexpression in  
634 *Escherichia coli* of the *rnf* genes from *Rhodobacter capsulatus* - Characterization of two  
635 membrane-bound iron-sulfur proteins. *Eur. J. Biochem.* **251**, 54–64 (1998).
- 636 39. Bar-Even, A., Noor, E. & Milo, R. A survey of carbon fixation pathways through a  
637 quantitative lens. *J. Exp. Bot.* **63**, 2325–2342 (2012).
- 638 40. Matelska, D. *et al.* Classification, substrate specificity and structural features of D-2-  
639 hydroxyacid dehydrogenases: 2HADH knowledgebase. *BMC Evol. Biol.* **18**, 1–23 (2018).
- 640 41. Gordon, B. R. *et al.* Decoupled genomic elements and the evolution of partner quality in  
641 nitrogen-fixing rhizobia. *Ecol. Evol.* **6**, 1317–1327 (2016).
- 642 42. Junier, I. & Rivoire, O. Synteny in Bacterial Genomes: Inference, Organization and  
643 Evolution. (2013).
- 644 43. Sevillya, G. & Snir, S. Synteny footprints provide clearer phylogenetic signal than  
645 sequence data for prokaryotic classification. *Mol. Phylogenet. Evol.* **136**, 128–137 (2019).
- 646 44. Mcinerney, M. J., Sieber, J. R. & Gunsalus, R. P. Syntrophy in Anaerobic Global Carbon  
647 Cycles. *Curr. Opin. Biotechnol.* **20**, 623–632 (2010).
- 648 45. Raymann, K., Brochier-Armanet, C. & Gribaldo, S. The two-domain tree of life is linked to  
649 a new root for the Archaea. *Proc. Natl. Acad. Sci. U. S. A.* **112**, 6670–6675 (2015).
- 650 46. Battistuzzi, F. U., Feijao, A. & Hedges, S. B. A genomic timescale of prokaryote evolution:  
651 Insights into the origin of methanogenesis, phototrophy, and the colonization of land. *BMC*  
652 *Evol. Biol.* **4**, 1–14 (2004).
- 653 47. Pasek, M. A., Harnmeijer, J. P., Buick, R., Gull, M. & Atlas, Z. Evidence for reactive  
654 reduced phosphorus species in the early Archean ocean. *Proc. Natl. Acad. Sci.* **110**,  
655 10089–10094 (2013).
- 656 48. Pasek, M. A role for phosphorus redox in emerging and modern biochemistry. *Curr. Opin.*  
657 *Chem. Biol.* **49**, 53–58 (2019).
- 658 49. Lyons, T. W., Reinhard, C. T. & Planavsky, N. J. The rise of oxygen in Earth's early ocean  
659 and atmosphere. *Nature* **506**, 307–315 (2014).
- 660 50. Wolf, Y. I. & Koonin, E. V. Genome reduction as the dominant mode of evolution.  
661 *BioEssays* 829–837 (2013) doi:10.1002/bies.201300037.
- 662 51. Pirim, C. *et al.* Investigation of schreibersite and intrinsic oxidation products from Sikhote-  
663 Alin, Seymchan, and Odessa meteorites and Fe<sub>3</sub>P and Fe<sub>2</sub>NiP synthetic surrogates.  
664 *Geochim. Cosmochim. Acta* **140**, 259–274 (2014).
- 665 52. Pasek, M. & Block, K. Lightning-induced reduction of phosphorus oxidation state. *Nat.*  
666 *Geosci.* **2**, 553–556 (2009).
- 667 53. Balch, W. E., Fox, G. E., Magrum, L. J., Woese, C. R. & Wolfe, R. S. Methanogens□:  
668 Reevaluation of a Unique Biological Group. **43**, 260–296 (1979).
- 669 54. Joshi, N. & JN, F. Sickle: A sliding-window, adaptive, quality-based trimming tool for  
670 FastQ files (Version 1.33). [*Software*] (2011).
- 671 55. Kim, D., Song, L., Breitwieser, F. P. & Salzberg, S. L. Centrifuge: rapid and accurate  
672 classification of metagenomic sequences. *bioRxiv* **26**, 054965 (2016).
- 673 56. Li, D., Liu, C. M., Luo, R., Sadakane, K. & Lam, T. W. MEGAHIT: An ultra-fast single-node

- 674 solution for large and complex metagenomics assembly via succinct de Bruijn graph.  
675 *Bioinformatics* **31**, 1674–1676 (2015).
- 676 57. Li, H. & Durbin, R. Fast and accurate short read alignment with Burrows-Wheeler  
677 transform. *Bioinformatics* **25**, 1754–1760 (2009).
- 678 58. Eren, A. M. *et al.* Anvi'o: an advanced analysis and visualization platform for 'omics data.  
679 *PeerJ* **3**, (2015).
- 680 59. Alneberg, J. *et al.* Binning metagenomic contigs by coverage and composition. *Nat.*  
681 *Methods* **11**, 1144–1146 (2014).
- 682 60. Parks, D. H., Imelfort, M., Skennerton, C. T., Hugenholtz, P. & Tyson, G. W. CheckM<sup>2</sup>:  
683 assessing the quality of microbial genomes recovered from isolates, single cells, and  
684 metagenomes. *Genome Res.* 1043–1055 (2015) doi:10.1101/gr.186072.114.Freely.
- 685 61. Hyatt, D. *et al.* Prodigal: Prokaryotic gene recognition and translation initiation site  
686 identification. *BMC Bioinformatics* **11**, (2010).
- 687 62. Seemann, T. Prokka<sup>2</sup>: rapid prokaryotic genome annotation. *Bioinformatics* **30**, 2068–  
688 2069 (2014).
- 689 63. Shaffer, M. *et al.* DRAM for distilling microbial metabolism to automate the curation of  
690 microbiome function. *Nucleic Acids Res.* 1–58 (2020)  
691 doi:<https://doi.org/10.1101/2020.06.29.177501>.
- 692 64. Edgar, R. C. MUSCLE: Multiple sequence alignment with high accuracy and high  
693 throughput. *Nucleic Acids Res.* **32**, 1792–1797 (2004).
- 694 65. Price, M. N., Dehal, P. S. & Arkin, A. P. FastTree 2 - Approximately Maximum-Likelihood  
695 Trees for Large Alignments. *PLoS One* **5**, (2010).
- 696 66. Johnson, L. S., Eddy, S. R. & Portugaly, E. Hidden Markov model speed heuristic and  
697 iterative HMM search procedure. *BMC Bioinformatics* (2010).
- 698 67. Yoon, B. Hidden Markov Models and their Applications in Biological Sequence Analysis.  
699 402–415 (2009).
- 700 68. Li, W., Fu, L., Niu, B., Wu, S. & Wooley, J. Ultrafast clustering algorithms for metagenomic  
701 sequence analysis. *Brief. Bioinform.* **13**, 656–668 (2012).
- 702 69. Huson, D. H. & Scornavacca, C. Dendroscope 3<sup>2</sup>: An Interactive Tool for Rooted  
703 Phylogenetic Trees and Networks. *Syst. Biol.* **61**, 1061–1067 (2012).
- 704 70. Veltri, D., Wight, M. M. & Crouch, J. A. SimpleSynteny: a web-based tool for visualization  
705 of microsynteny across multiple species. *Nucleic Acids Res.* **44**, W41–W45 (2016).
- 706 71. Wu, D., Jospin, G. & Eisen, J. A. Systematic Identification of Gene Families for Use as  
707 'Markers' for Phylogenetic and Phylogeny-Driven Ecological Studies of Bacteria and  
708 Archaea and Their Major Subgroups. *PLoS One* **8**, (2013).
- 709 72. Mandler, K. *et al.* Annotree: Visualization and exploration of a functionally annotated  
710 microbial tree of life. *Nucleic Acids Res.* **47**, 4442–4448 (2019).
- 711 73. Kanehisa, M., Sato, Y., Kawashima, M., Furumichi, M. & Tanabe, M. KEGG as a  
712 reference resource for gene and protein annotation. *Nucleic Acids Res.* **44**, D457–D462  
713 (2016).

714

715 **Figures and Tables.**

716

717 **Figure 1: DPO Enrichment Activity.** (A) Representative phosphite oxidation by the SM1  
718 community. Temporal ion concentrations are shown for live (solid lines) or autoclaved (dashed  
719 lines) inoculum. Enrichments were amended with 10 mM phosphite at the spike point. (B) Percent  
720 change of measured ions for each enrichment community. Each row represents one community;  
721 each column displays the percent-accumulation or consumption of each titled ion. Row labels are  
722 colored according to the added electron acceptor (black, CO<sub>2</sub> only; blue, CO<sub>2</sub>+SO<sub>4</sub><sup>2-</sup>; green,  
723 CO<sub>2</sub>+NO<sub>3</sub><sup>-</sup>). A white dotted line denotes 50% consumption of PO<sub>3</sub><sup>3-</sup>. All percentages were  
724 calculated from concentration values *prior* to the first spike point. (C) Duration of ion depletion.  
725 Horizontal bars show the time frame for metabolic activity of each measured ion. Colors  
726 correspond with panel B (red, PO<sub>3</sub><sup>3-</sup>; blue, SO<sub>4</sub><sup>2-</sup>; green, NO<sub>3</sub><sup>-</sup>).

727

728 **Figure 2: Relative Abundance of DPO MAGs.** (A) Relative abundance of MAGs across  
729 samples. Each point represents one MAG. Color represents the presence (black) or absence  
730 (grey) of any *ptx-ptd* genes. Top panel compares samples from phosphite-amended exponential  
731 phase (+Pe) to no-phosphite (-Ps) controls. Bottom panel compares samples from phosphite-  
732 amended stationary phase (+Ps) to no-phosphite (-Ps) controls. (B) Relative abundance of MAGs  
733 across time. Each subplot represents one community, while each stacked bar represents the  
734 community composition of one sample. Colors indicate the dominant (maroon), second dominant  
735 (pink) and third dominant (yellow) DPO members, and all remaining community members (grey).  
736 Relative abundance was calculated by dividing the mean coverage of a single MAG by the sum of  
737 mean coverages for all MAGs in the respective sample.

738

739 **Figure 3: Phylogenetic Trees of DPO MAGs.** A) A phylogenetic tree of bacterial genomes from  
740 the GTDB was visualized with AnnoTree<sup>72</sup>. Nodes of the tree represent class-level taxonomy, and  
741 those nodes with DPO organisms are highlighted according to the key. B-D) Phylogenetic trees of  
742 the *rpS8* marker gene showing the relationship of DPO MAGs to their closest relatives. Panels  
743 depict DPO MAGs belonging to the same phyla: B) *Firmicutes*; C) *Synergistota*; D)  
744 *Desulfobacterota*. The DPO MAGs from this study are bolded. Colored squares represent their  
745 dominance rank from Fig. 2B. Each close relative is annotated with its species name, accession  
746 number and genome-source type (isolate vs. MAG), as well as its percent identity to the most  
747 closely related DPO MAG from this study. Clades are colored and labeled by taxonomic class.  
748 Internal nodes with bootstrap support of >90% are indicated by closed circles and those with  
749 support of >70% by open circles. Scale bars: 0.2 change per amino acid residue.

750

751 **Figure 4: Metabolic model of energy conservation by *Desulfomonilia\_A* DPOM** (adapted  
752 from Figueroa, *et al.*)<sup>17</sup>. Dotted lines represent mechanisms that have not been biochemically  
753 confirmed. Balanced equations are provided for phosphite oxidation and CO<sub>2</sub> reduction to D-  
754 lactate. **Dissimilatory Phosphite Oxidation proteins:** (1) PtdC, phosphite-phosphate antiporter;  
755 (2) PtxDE-PtdFHI, putative phosphite dehydrogenase protein complex. **CO<sub>2</sub> Reduction**  
756 **(Reductive Glycine Pathway) proteins:** (3) FdhAB/FdoGHI, formate dehydrogenase; (4) Fhs,  
757 formate:THF ligase; (5) FoID, methylene-THF dehydrogenase/methenyl-THF cyclohydrolase; (6)  
758 glycine cleavage system (GcvH, lipoyl-carrier protein; GcvPAB, glycine dehydrogenase; GcvT,  
759 aminomethyltransferase; Lpd, dihydrolipoyl dehydrogenase); (7) GlyA, serine  
760 hydroxymethyltransferase; (8) SdaA/IlvA, serine dehydratase/threonine dehydratase; (9) LdhA, D-  
761 lactate dehydrogenase. **Energy Conversion proteins:** (10) ATP synthase complex (11) Rnf,  
762 sodium-translocating ferredoxin:NAD oxidoreductase complex (12) NfnAB, NAD-dependent  
763 ferredoxin:NADP oxidoreductase.

764

765 **Figure 5: Carbon and Energy Metabolism of DPO MAGs.** Each DPO MAG was subjected to  
766 metabolic analysis via DRAM<sup>83,73</sup>. Within this heatmap, each cell represents a metabolic pathway  
767 (columns) for each DPO genome (rows). The number of genes for a given pathway is described  
768 by percent completion ranging from 0% (white) to 100% (brown). Pathways are organized into  
769 modules related to carbon metabolism, electron transport chain (ETC) complexes, and other  
770 enzymes referenced in the text. Organisms are annotated with their taxonomic class.

771

772 **Figure 6: CO<sub>2</sub> Dependent DPO Activity.** Growth and phosphite concentrations were temporally  
773 monitored in the presence and absence of CO<sub>2</sub> for the SV3 community. Autoclaved controls  
774 showed no activity. Error bars represent standard deviation of triplicate cultures.

775

776 **Figure 7: Phylogenetic tree of the phosphite dehydrogenase PtxD.** A) The PtxD from IMG/M  
777 metagenomes and DPO MAGs were aligned with proteins from the 2-hydroxyacid  
778 dehydrogenase family (Pfam PF00389, set representative proteomes to 15%). Protein  
779 subfamilies were assigned based on Matelska et al.<sup>40</sup>. An arrow indicates the location of PtxD  
780 proteins that are associated with DPO PtdC but clade with assimilatory phosphite oxidation PtxD  
781 (APO). Scale bar: 0.5 change per amino acid residue. B) Refined tree of all PtxD within the DPO-  
782 PtxD clade. PtxD from the IMG/M are in light black font and labeled with their source environment  
783 and scaffold ID. PtxD from our enriched DPO MAGs are bolded and labeled with their bacterial  
784 host name. PtxD that belong to a binned organism are highlighted based on their taxonomic  
785 class. Published organisms with validated DPO activity are in red font. Only genes adhering to  
786 the IMG/M data usage policy are shown. Internal nodes with bootstrap support of >70% are  
787 indicated by closed circles and those with support of >50% by open circles. Scale bar: 0.2 change  
788 per amino acid residue. C) The presence (maroon) or absence (light pink) of *ptx-ptd* genes in  
789 each genome was determined using custom pHMM models. Genes that were absent from a DPO  
790 MAG but present in the assembly are in grey, where phylogeny, tanglegrams, and synteny were  
791 collectively used to predict the most likely host. D) Horizontal grey bars display the size (bp) of  
792 the contig on which each PtxD was found and are in logarithmic scale to visualize the full range of  
793 contig lengths. The black dotted line indicates the minimum length for all seven *ptx-ptd* genes to  
794 be present, based on FiPS-3 sequences (7137 bp). Asterisks signify contigs that were binned. bp,  
795 base pair.



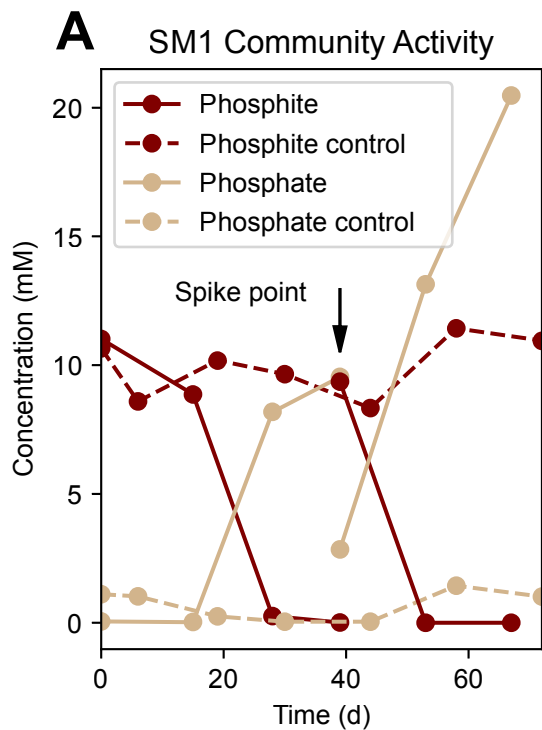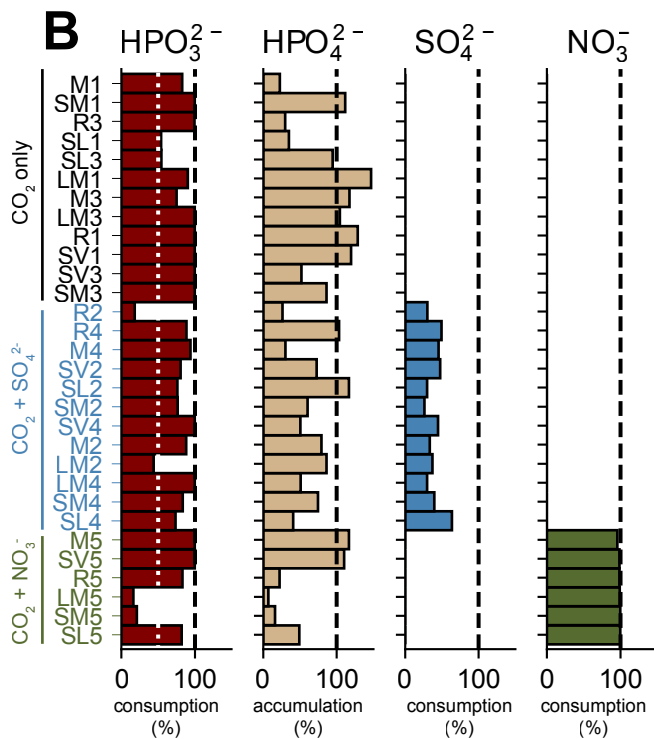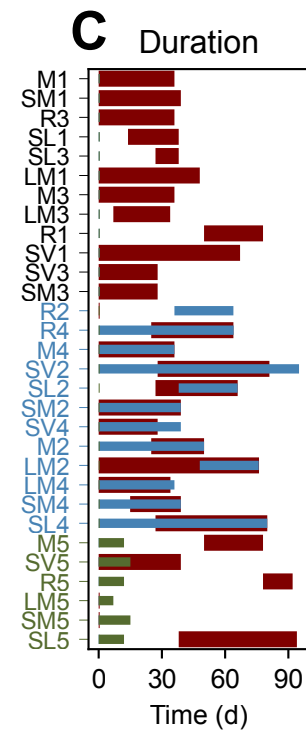

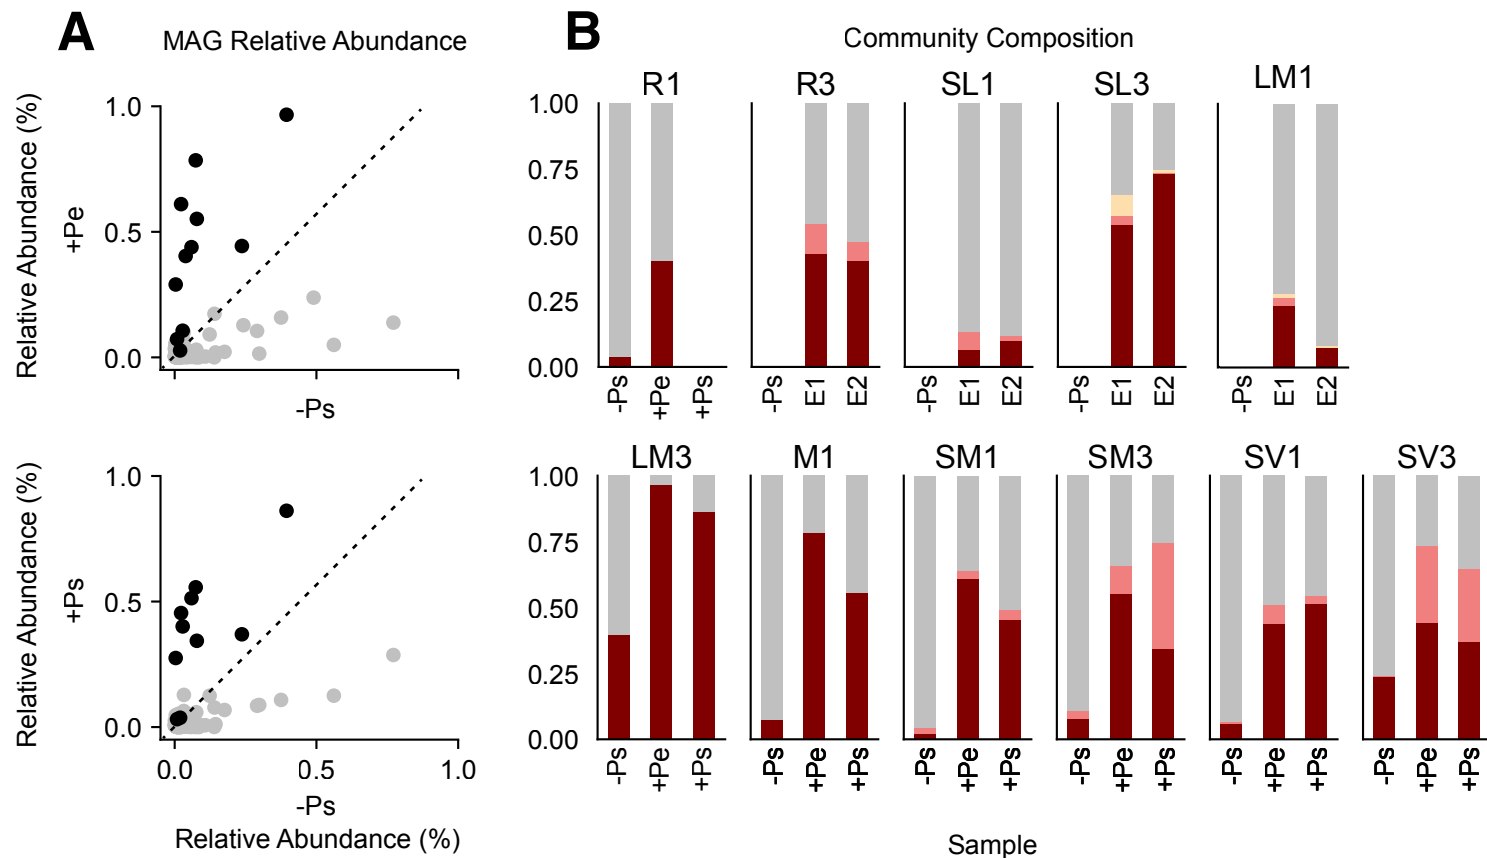

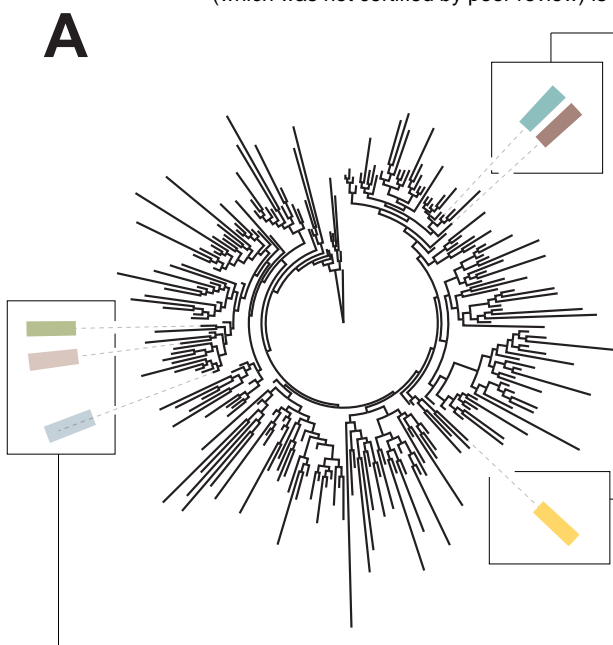

DPOM Taxonomic Classes by Color

|                                                              |                                                             |
|--------------------------------------------------------------|-------------------------------------------------------------|
| <span style="color: green;">■</span> <i>Desulfomonilia_A</i> | <span style="color: yellow;">■</span> <i>Synergistia</i>    |
| <span style="color: brown;">■</span> <i>Syntrophia</i>       | <span style="color: darkred;">■</span> <i>Negativicutes</i> |
| <span style="color: blue;">■</span> <i>Desulfobacteria</i>   | <span style="color: teal;">■</span> <i>Desulfotomaculia</i> |

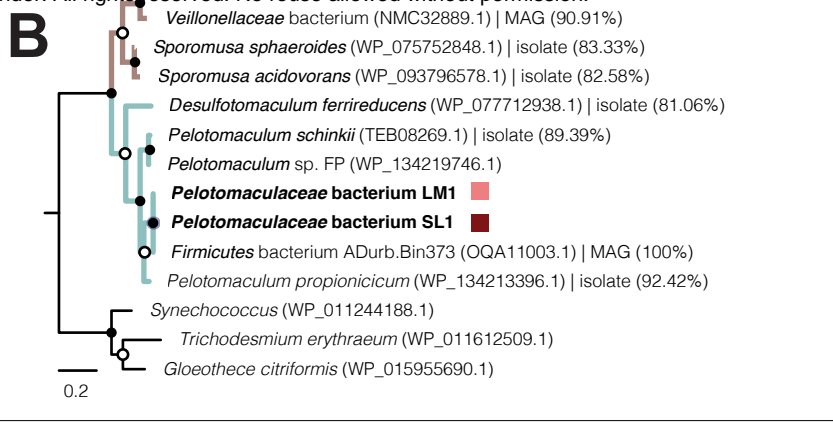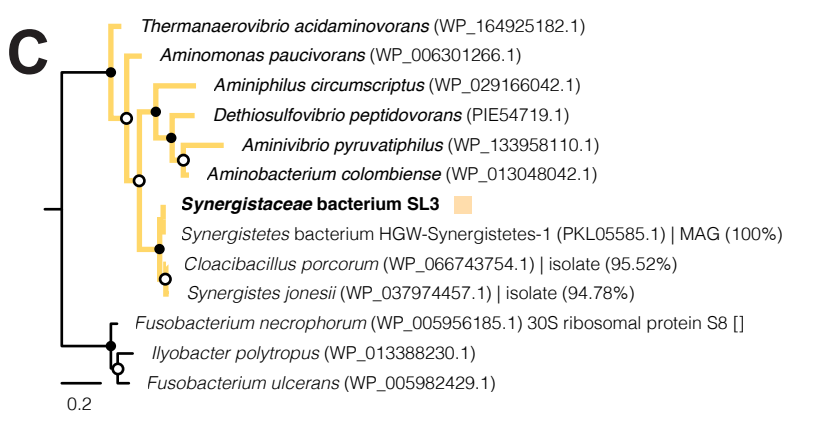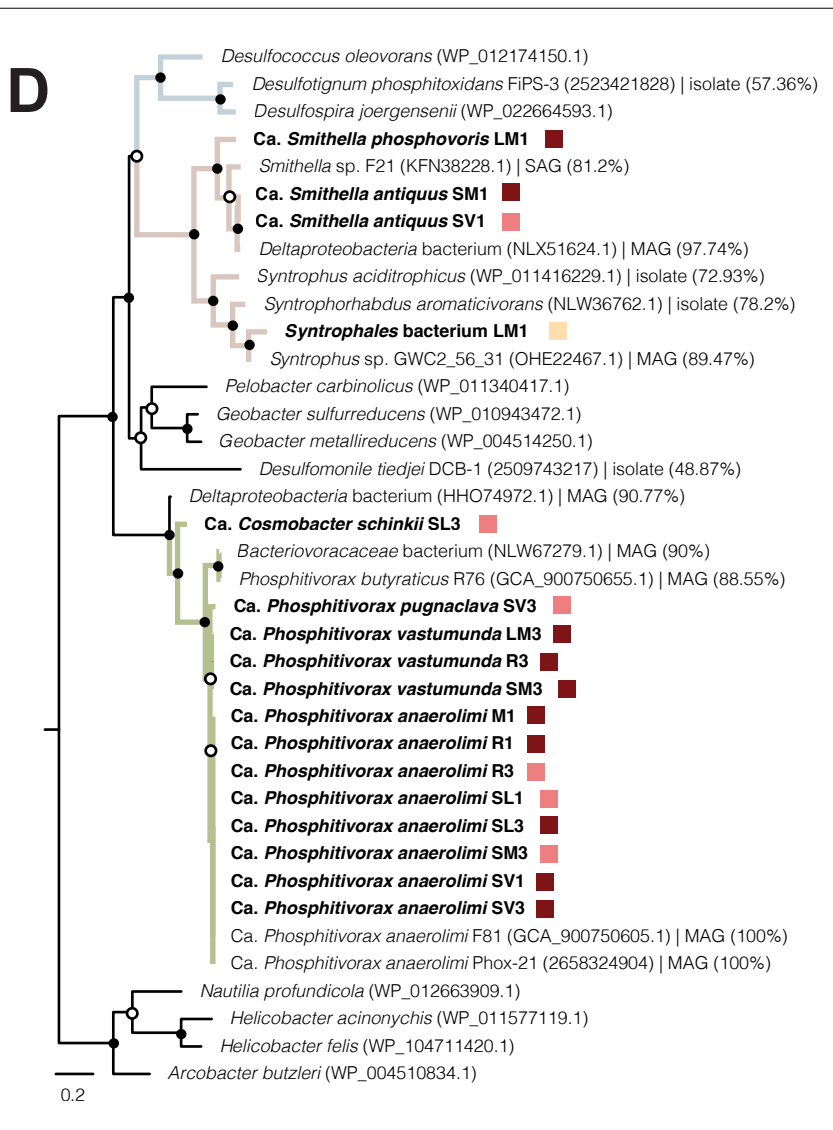

Dissimilatory Phosphite Oxidation

CO<sub>2</sub> Reduction (Reductive Glycine Pathway)

Energy Conversion

OM

IM

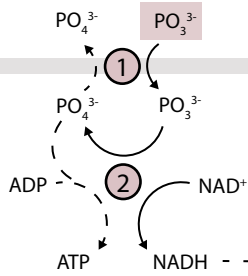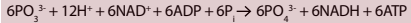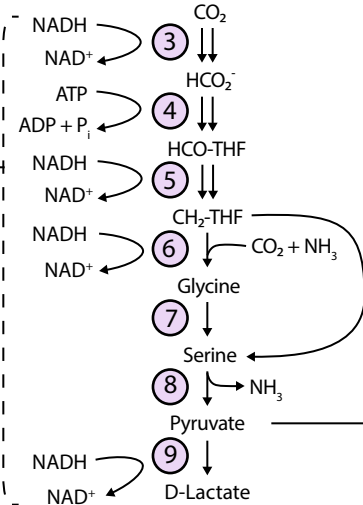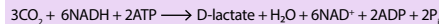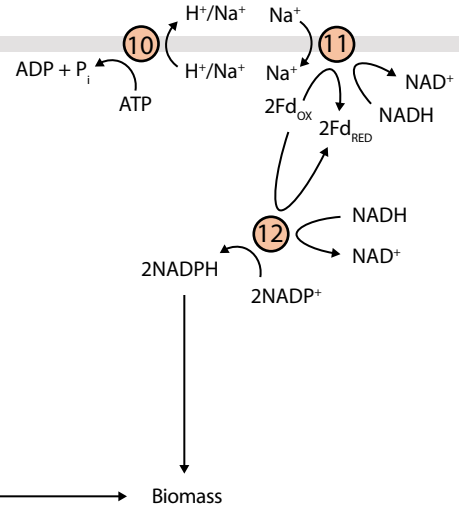

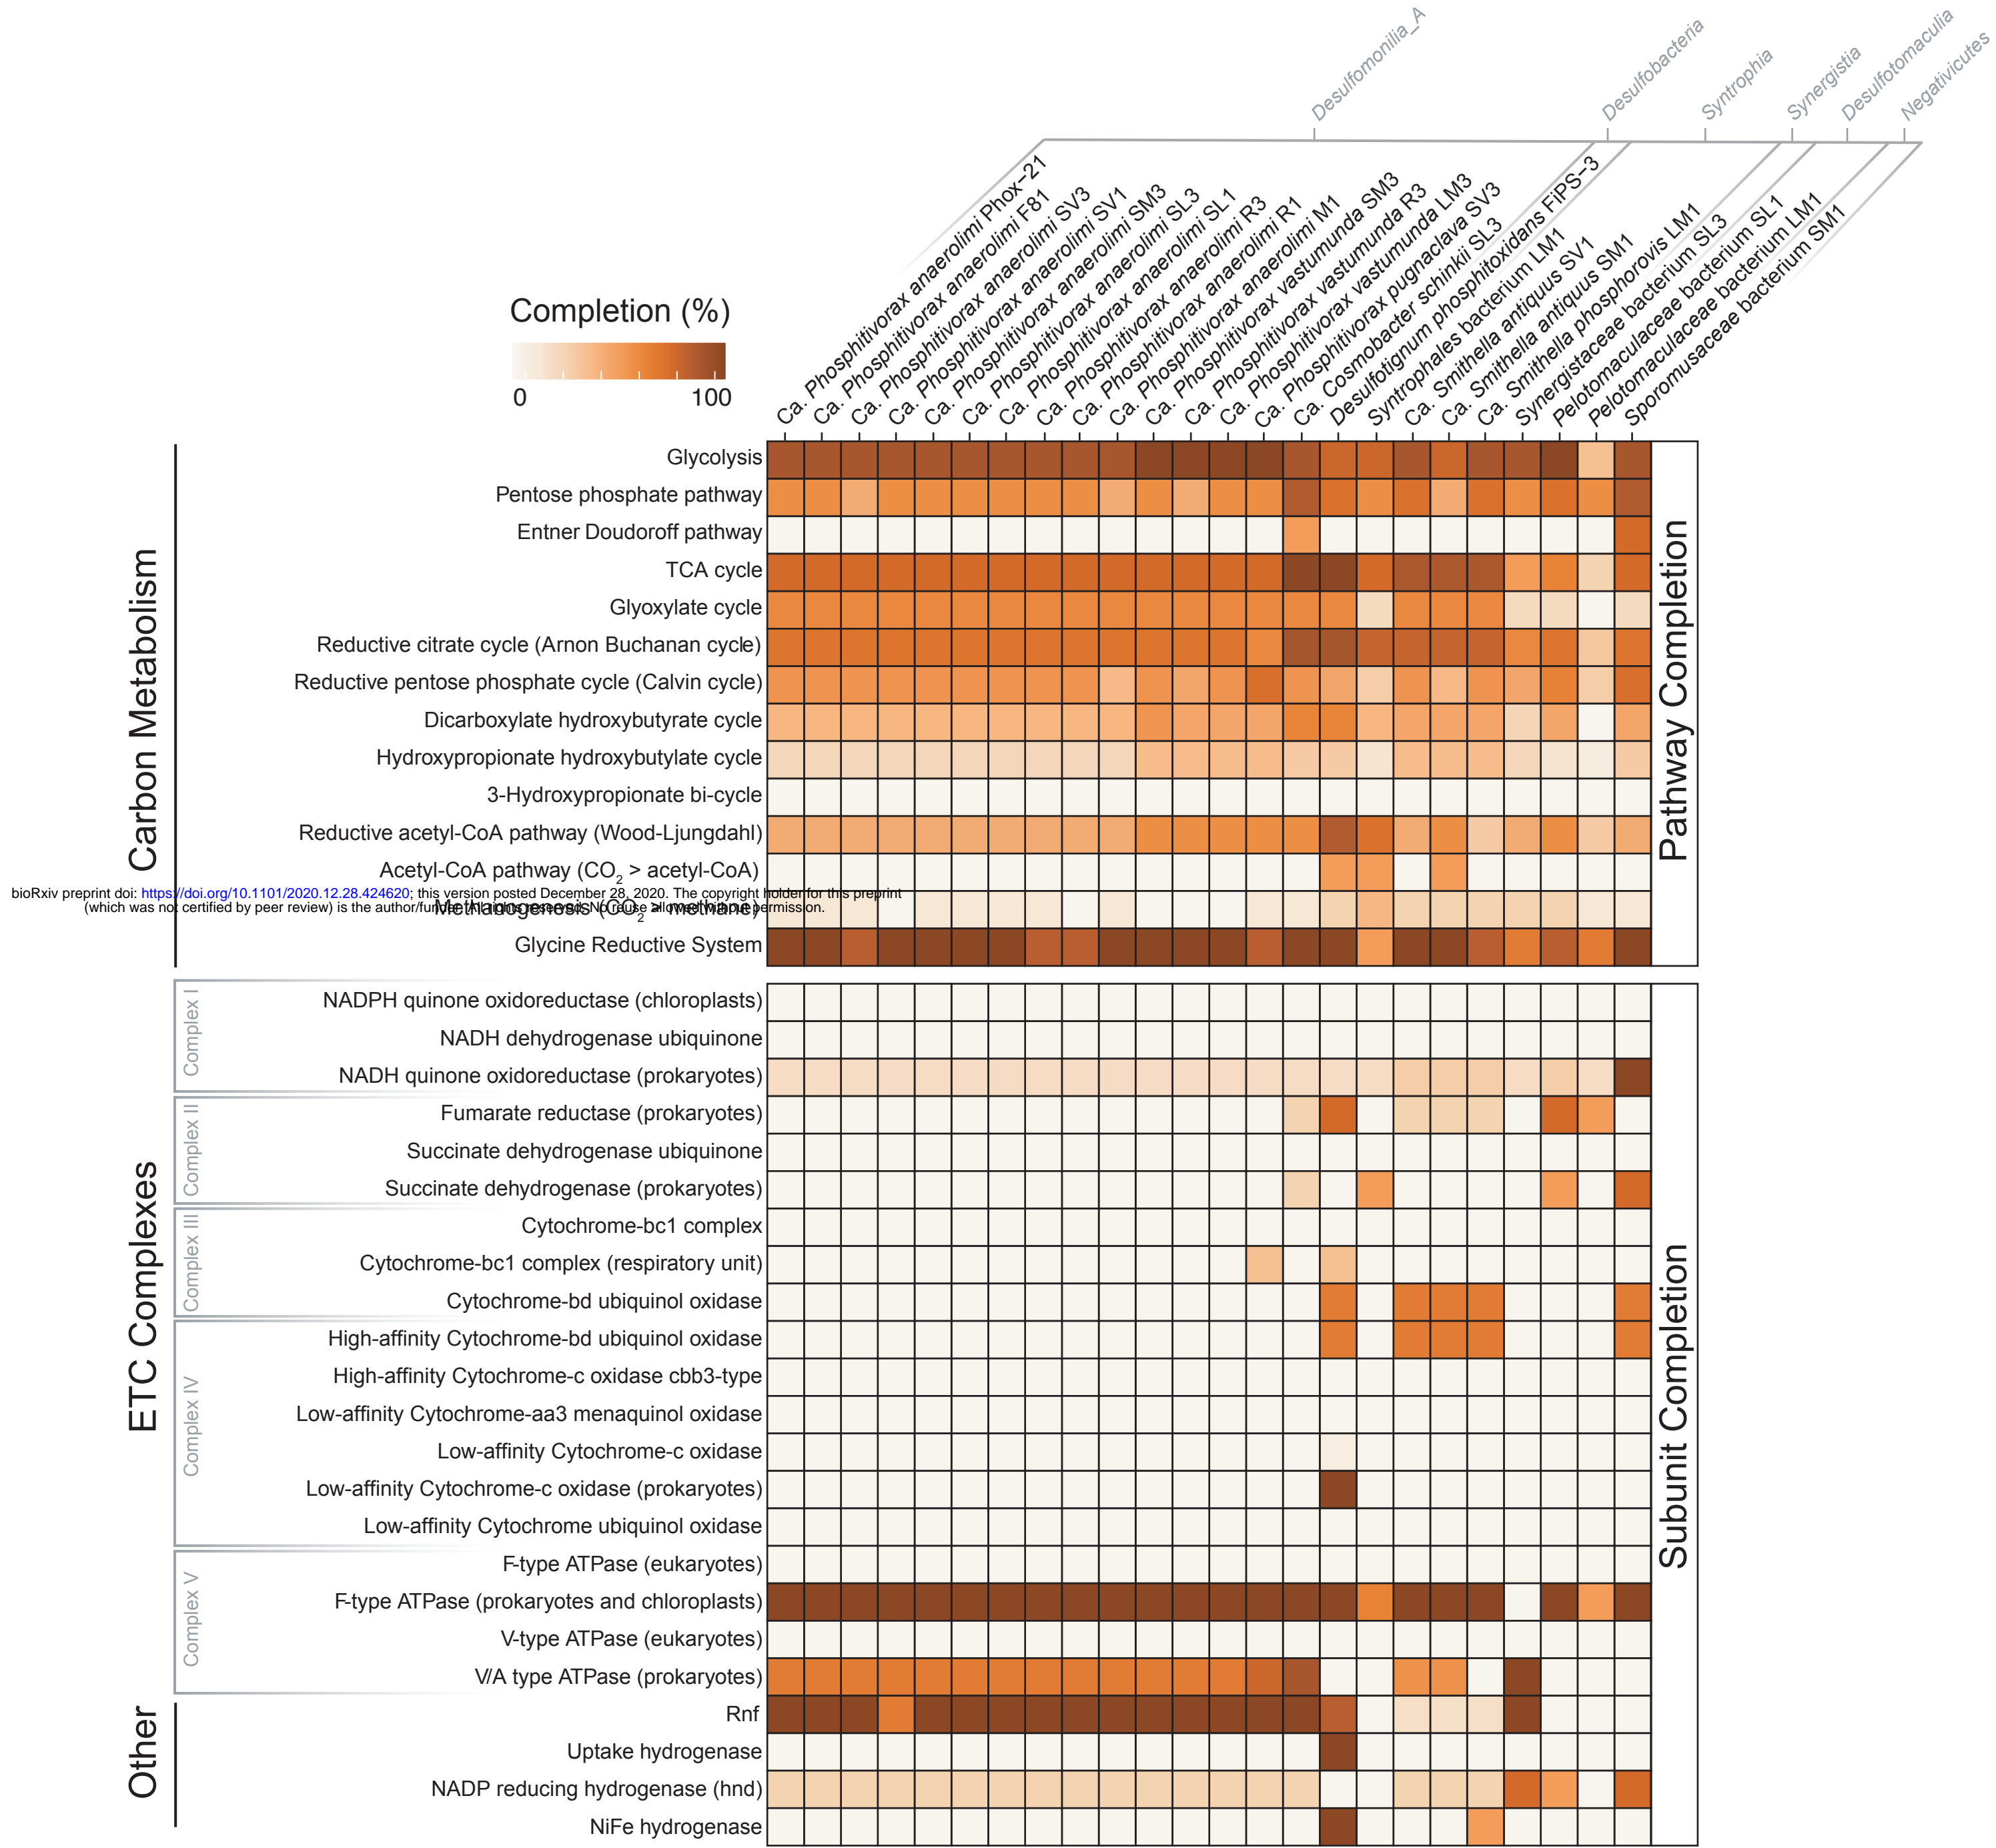



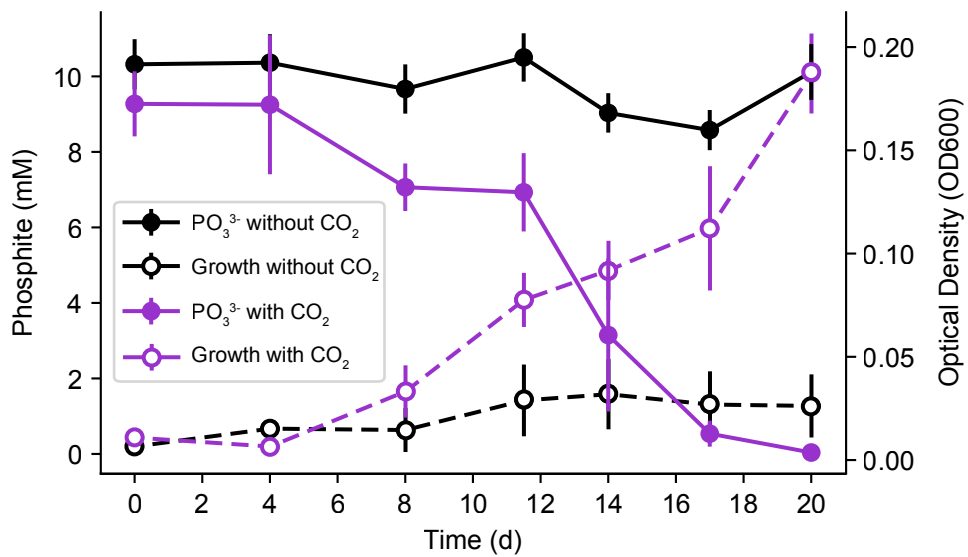

**A**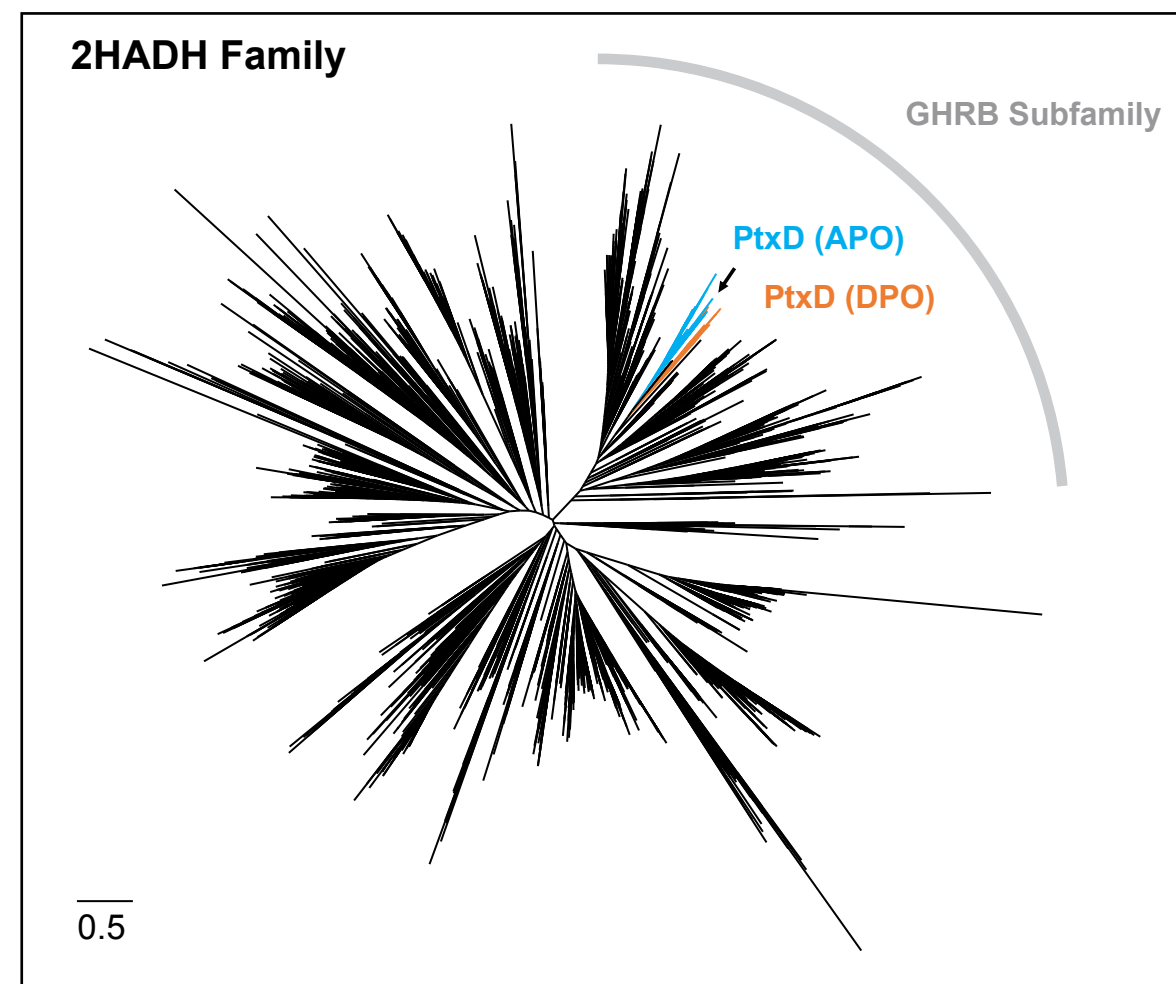**Panel B Key: Taxonomic Class**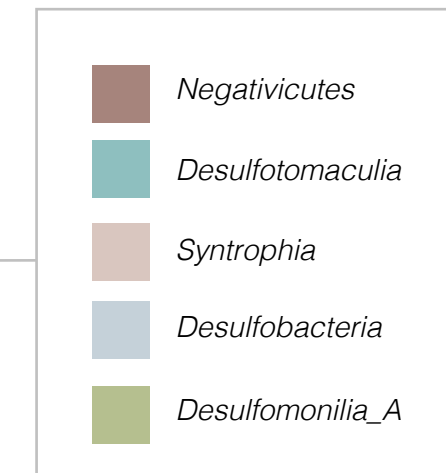**B**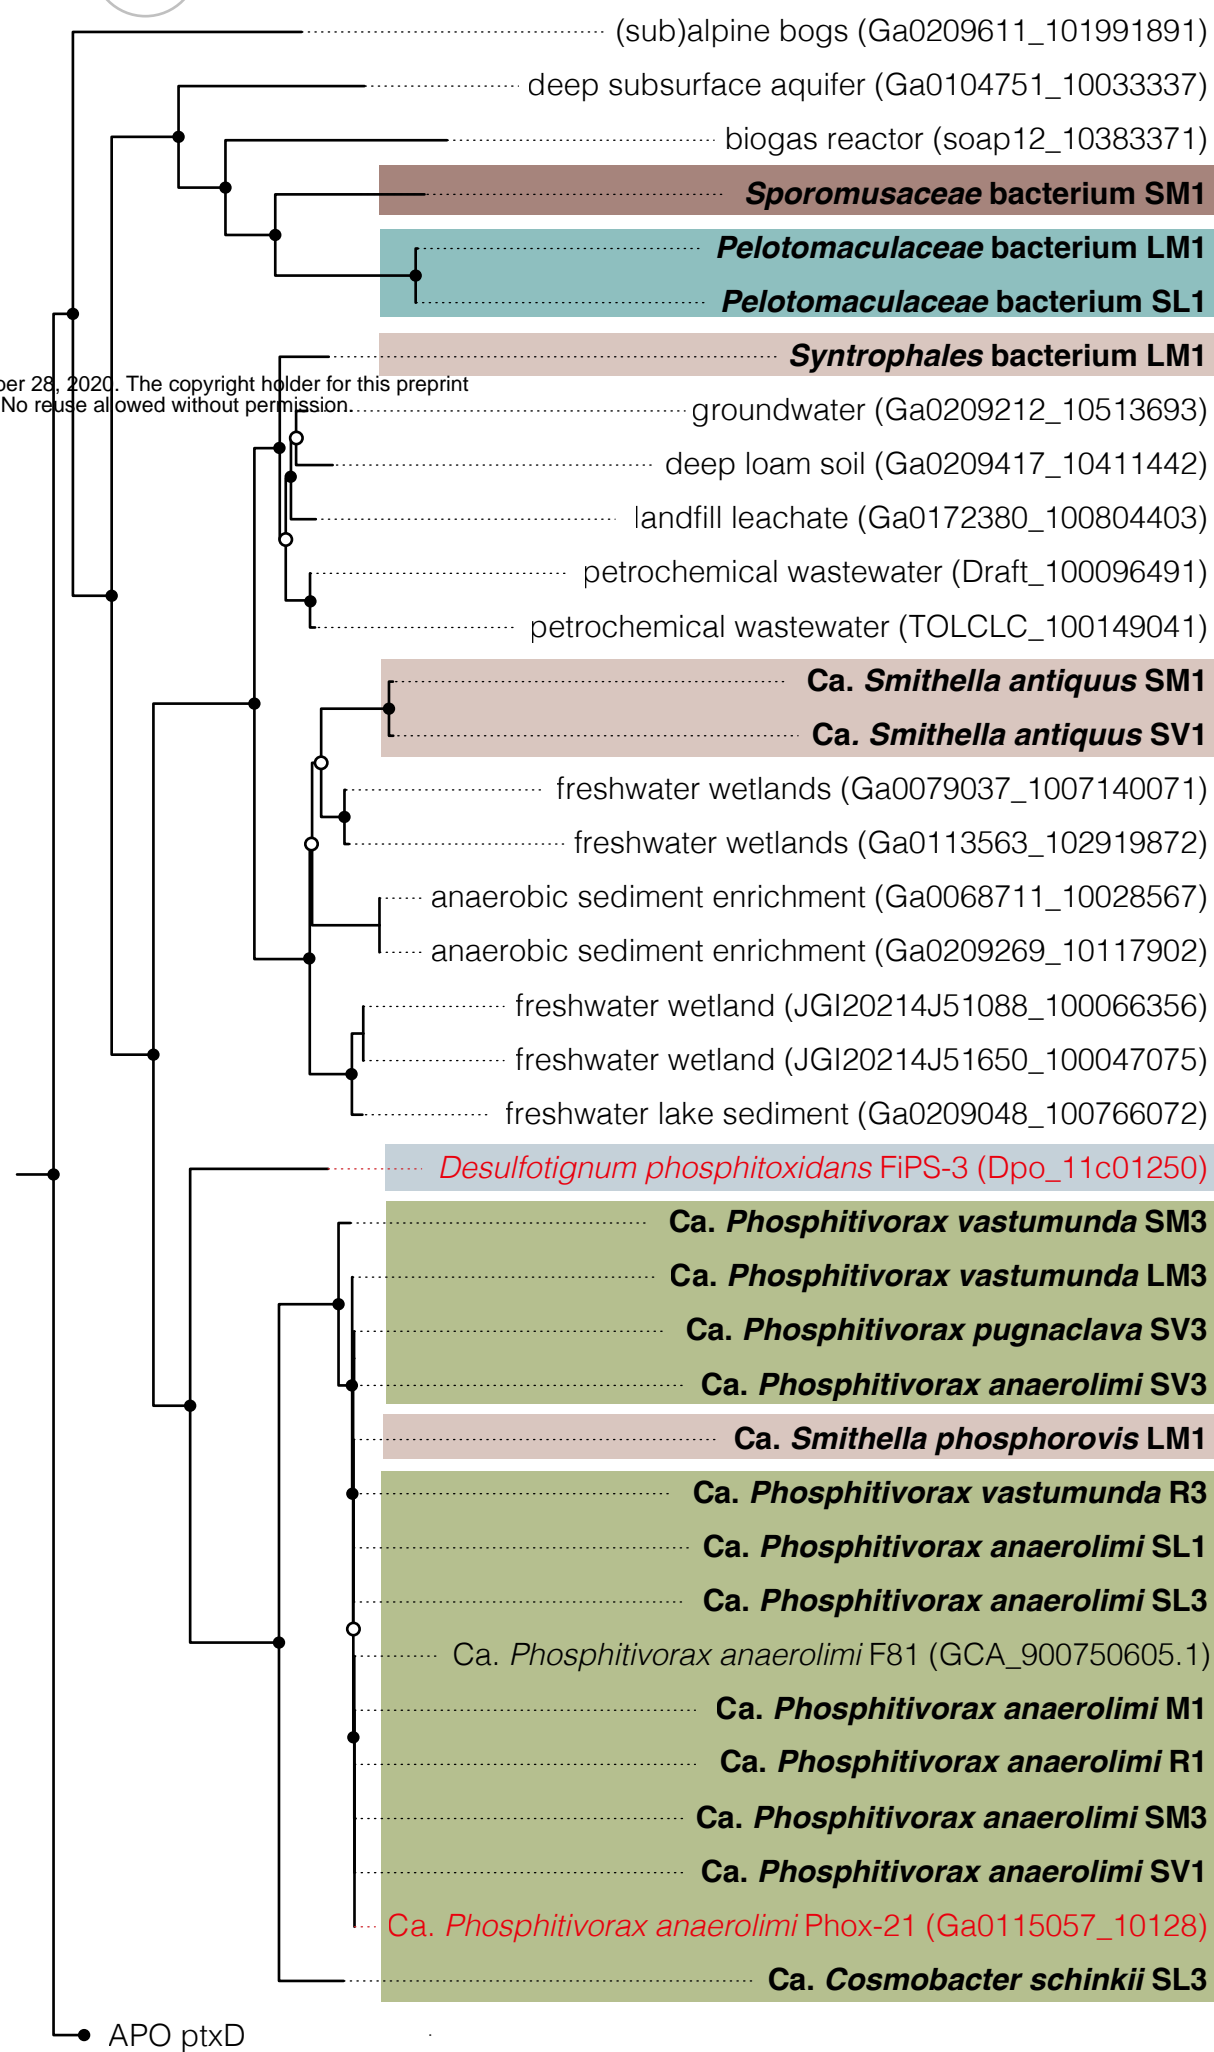**C***ptx-ptd* genes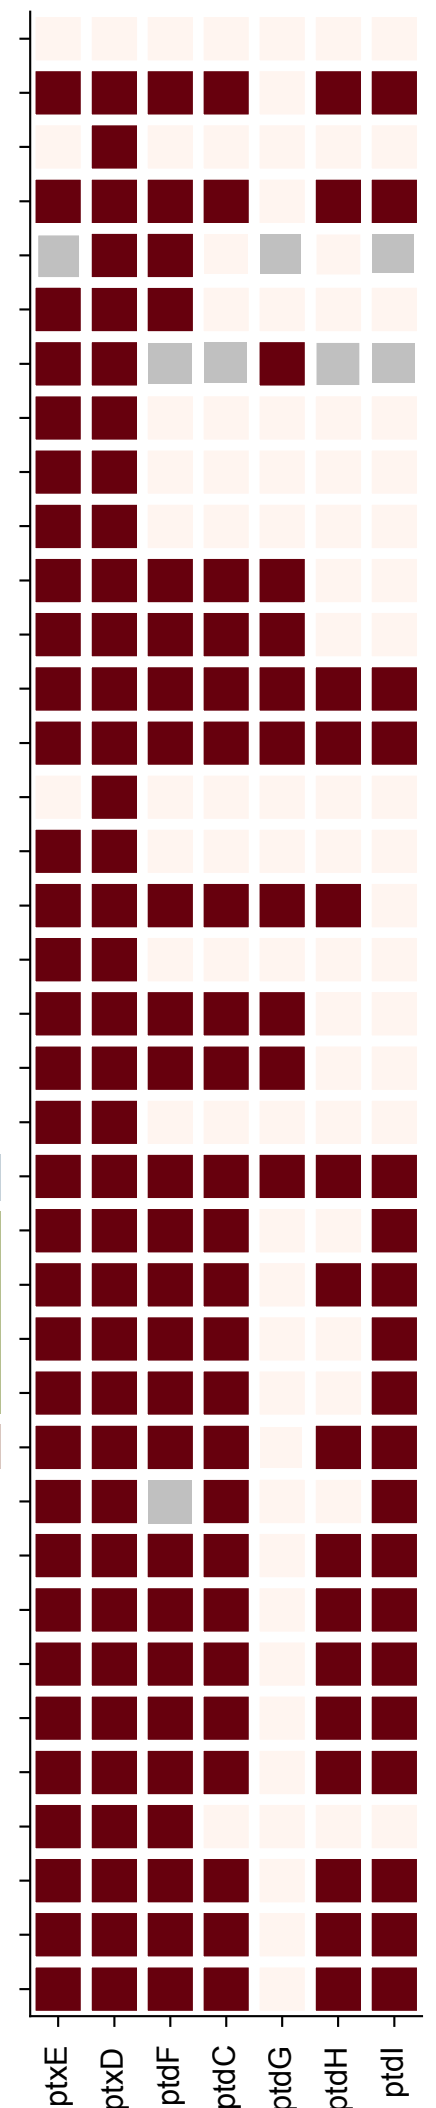**D**

scaffold size (bp)

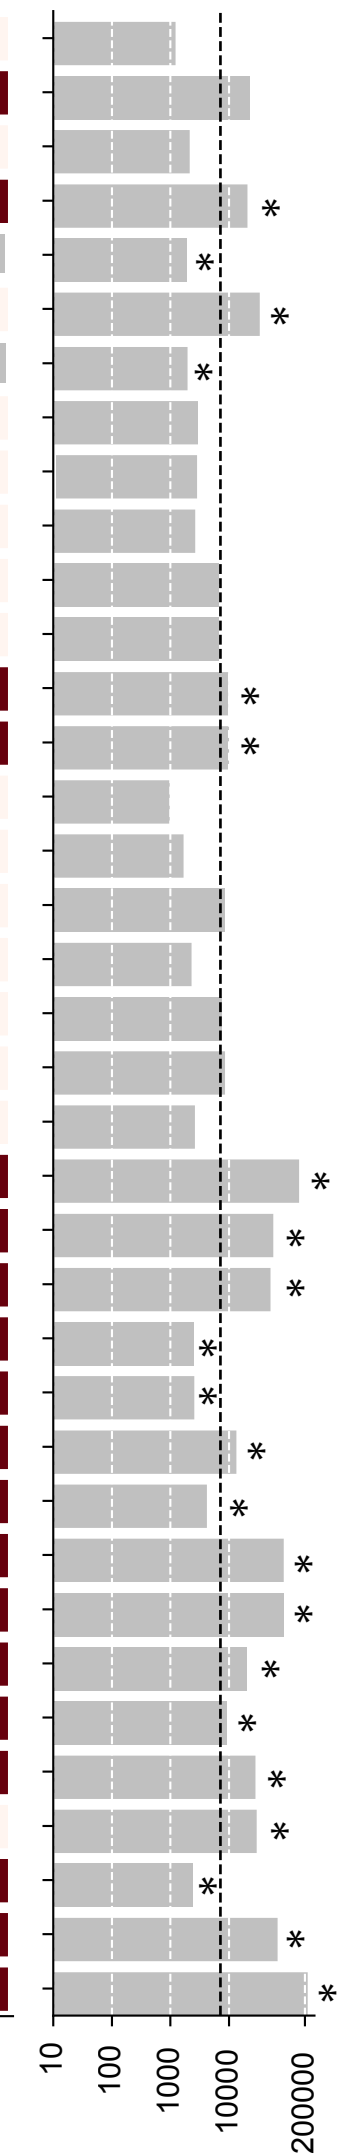

Source: https://www.biorxiv.org/content/10.1101/2020.12.28.424620v1.full.pdf
